# Supplementary material for: Macathiohydantoin L, a Novel Thiohydantoin Bearing a Thioxohexahydroimidazo [1,5-a] Pyridine Moiety from Maca (Lepidium meyenii Walp.)
Source: MDPI journal article supplement (doi:10.3390/molecules26164934), 2021-08-14
Supplement: s1 [file s1]

**Macathiohydantoin L, a Novel Thioxohexahydroimidazo [1,5-a] Pyridine  
Derivatives from Maca (*Lepidium meyenii*)**

Ranran Zhang<sup>1, 2</sup>, Junhong Liu<sup>1,2</sup>, Hui Yan<sup>1</sup>, Xingrong Peng<sup>1</sup>, Ling Zhang<sup>1</sup> and  
Minghua Qiu<sup>1, \*</sup>

*<sup>1</sup>State Key Laboratory of Phytochemistry and Plant Resources in West China,  
Kunming Institute of Botany, Chinese Academy of Science, Kunming 650201, People's  
Republic of China*

*Email: zhangranran@mail.kib.ac.cn. Email: liujunhong@mail.kib.ac.cn. Email:  
[yanhui@mail.kib.ac.cn](mailto:yanhui@mail.kib.ac.cn). Email: [pengxingrong@mail.kib.ac.cn](mailto:pengxingrong@mail.kib.ac.cn) Email: [zhang-  
874005@163.com](mailto:zhang-874005@163.com)*

*<sup>2</sup> University of the Chinese Academy of Science, Beijing 100049, People's Republic of  
China*

*\* Corresponding author: Telephone: +86-0871-65223327. Fax: +86-0871-65223325.*

*E-mail: [mhchiu@mail.kib.ac.cn](mailto:mhchiu@mail.kib.ac.cn)*

## Table of Contents

|                                                                                                        |    |
|--------------------------------------------------------------------------------------------------------|----|
| Figure S1-1. HR-ESI-MS spectrum of <b>1</b> .....                                                      | 5  |
| Figure S1-2 ESI-MS spectrum of <b>1</b> .....                                                          | 6  |
| Figure S1-3 The chiral analytical HPLC chromatography of <b>1</b> .....                                | 6  |
| Figure S1-4. $[\alpha]_D$ data of (+)- <b>1</b> .....                                                  | 6  |
| Figure S1-5. $[\alpha]_D$ data of (–)- <b>1</b> .....                                                  | 7  |
| Figure S1-6. CD and UV spectrum of (+)- <b>1</b> in MeOH.....                                          | 8  |
| Figure S1-7. CD and UV spectrum of (–)- <b>1</b> in MeOH.....                                          | 9  |
| Figure S1-8. $^1\text{H}$ NMR spectrum of <b>1</b> in $\text{CDCl}_3$ (600 MHz) .....                  | 12 |
| Figure S1-9. $^{13}\text{C}$ NMR spectrum of <b>1</b> in $\text{CDCl}_3$ (150 MHz) .....               | 12 |
| Figure S1-10. $^1\text{H}$ - $^1\text{H}$ COSY spectrum of <b>1</b> in $\text{CDCl}_3$ (600 MHz) ..... | 13 |
| Figure S1-11. HSQC spectrum of <b>1</b> in $\text{CDCl}_3$ (600 MHz).....                              | 13 |
| Figure S1-12 HMBC spectrum of <b>1</b> in $\text{CDCl}_3$ (600 MHz).....                               | 14 |
| Figure S2-1. HR-ESI-MS spectrum of <b>2</b> .....                                                      | 15 |
| Figure S2-2 ESI-MS spectrum of <b>2</b> .....                                                          | 16 |
| Figure S2-3 The chiral analytical HPLC chromatography of <b>2</b> .....                                | 16 |
| Figure S2-4. $[\alpha]_D$ data of (+)- <b>2</b> .....                                                  | 17 |
| Figure S2-5. $[\alpha]_D$ data of (–)- <b>2</b> .....                                                  | 17 |
| Figure S2-6. CD and UV spectrum of (+)- <b>2</b> in MeOH.....                                          | 18 |
| Figure S2-7. CD and UV spectrum of (–)- <b>2</b> in MeOH.....                                          | 19 |

|                                                                                                        |    |
|--------------------------------------------------------------------------------------------------------|----|
| Figure S2-8. $^1\text{H}$ NMR spectrum of <b>2</b> in $\text{CDCl}_3$ (600 MHz) .....                  | 22 |
| Figure S2-9. $^{13}\text{C}$ NMR spectrum of <b>2</b> in $\text{CDCl}_3$ (150 MHz) .....               | 22 |
| Figure S2-10. $^1\text{H}$ - $^1\text{H}$ COSY spectrum of <b>2</b> in $\text{CDCl}_3$ (600 MHz) ..... | 23 |
| Figure S2-11. HSQC spectrum of <b>2</b> in $\text{CDCl}_3$ (600 MHz) .....                             | 23 |
| Figure S2-12 HMBC spectrum of <b>2</b> in $\text{CDCl}_3$ (600 MHz) .....                              | 24 |
| Figure S3-1. HR-ESI-MS spectrum of <b>3</b> .....                                                      | 25 |
| Figure S3-2. ESI-MS spectrum of <b>3</b> .....                                                         | 26 |
| Figure S3-2 The chiral analytical HPLC chromatography of <b>3</b> .....                                | 26 |
| Figure S3-3. $[\alpha]_D$ data of (+)- <b>3</b> .....                                                  | 26 |
| Figure S3-4. $[\alpha]_D$ data of (–)- <b>3</b> .....                                                  | 27 |
| Figure S3-5. CD and UV spectrum of (+)- <b>3</b> in MeOH .....                                         | 27 |
| Figure S3-6. CD and UV spectrum of (–)- <b>3</b> in MeOH .....                                         | 28 |
| Figure S3-7. $^1\text{H}$ NMR spectrum of <b>3</b> in $\text{CDCl}_3$ (600 MHz) .....                  | 30 |
| Figure S3-8. $^{13}\text{C}$ NMR spectrum of <b>3</b> in $\text{CDCl}_3$ (150 MHz) .....               | 30 |
| Figure S3-9. $^1\text{H}$ - $^1\text{H}$ COSY spectrum of <b>3</b> in $\text{CDCl}_3$ (600 MHz) .....  | 31 |
| Figure S3-10. HSQC spectrum of <b>3</b> in $\text{CDCl}_3$ (600 MHz) .....                             | 31 |
| Figure S3-11 HMBC spectrum of <b>3</b> in $\text{CDCl}_3$ (600 MHz) .....                              | 32 |
| Figure S4-1. HR-ESI-MS spectrum of <b>4</b> .....                                                      | 33 |
| Figure S4-2. ESI-MS spectrum of <b>4</b> .....                                                         | 34 |
| Figure S4-3 UV spectrum of <b>4</b> in MeOH .....                                                      | 35 |
| Figure S4-4 $[\alpha]_D$ data of <b>4</b> .....                                                        | 36 |
| Figure S4-5 $^1\text{H}$ NMR spectrum of <b>4</b> in $\text{CDCl}_3$ (600 MHz) .....                   | 36 |

|                                                                                                       |    |
|-------------------------------------------------------------------------------------------------------|----|
| Figure S4-6 $^{13}\text{C}$ NMR spectrum of <b>4</b> in $\text{CDCl}_3$ (150 MHz) .....               | 37 |
| Figure S4-7 $^1\text{H}$ - $^1\text{H}$ COSY spectrum of <b>4</b> in $\text{CDCl}_3$ (600 MHz) .....  | 37 |
| Figure S4-8 HSQC spectrum of <b>4</b> in $\text{CDCl}_3$ (600 MHz).....                               | 38 |
| Figure S4-9 HMBC spectrum of <b>4</b> in $\text{CDCl}_3$ (600 MHz).....                               | 38 |
| Figure S5-1. HR-ESI-MS spectrum of <b>5</b> .....                                                     | 39 |
| Figure S5-2. ESI-MS spectrum of <b>5</b> .....                                                        | 40 |
| Figure S5-3 $[\alpha]_{\text{D}}$ data of <b>5</b> .....                                              | 40 |
| Figure S5-4. CD and UV spectrum of <b>5</b> in MeOH.....                                              | 41 |
| Figure S5-5. $^1\text{H}$ NMR spectrum of <b>5</b> in $\text{CDCl}_3$ (600 MHz) .....                 | 43 |
| Figure S5-6. $^{13}\text{C}$ NMR spectrum of <b>5</b> in $\text{CDCl}_3$ (150 MHz) .....              | 43 |
| Figure S5-7. $^1\text{H}$ - $^1\text{H}$ COSY spectrum of <b>5</b> in $\text{CDCl}_3$ (600 MHz) ..... | 44 |
| Figure S5-8. HSQC spectrum of <b>5</b> in $\text{CDCl}_3$ (600 MHz).....                              | 44 |
| Figure S5-9. HMBC spectrum of <b>5</b> in $\text{CDCl}_3$ (600 MHz).....                              | 44 |
| Figure S6 Neuroprotective activities of selected compounds .....                                      | 45 |

## Supporting information list

Figure S1-1. HR-ESI-MS spectrum of **1**

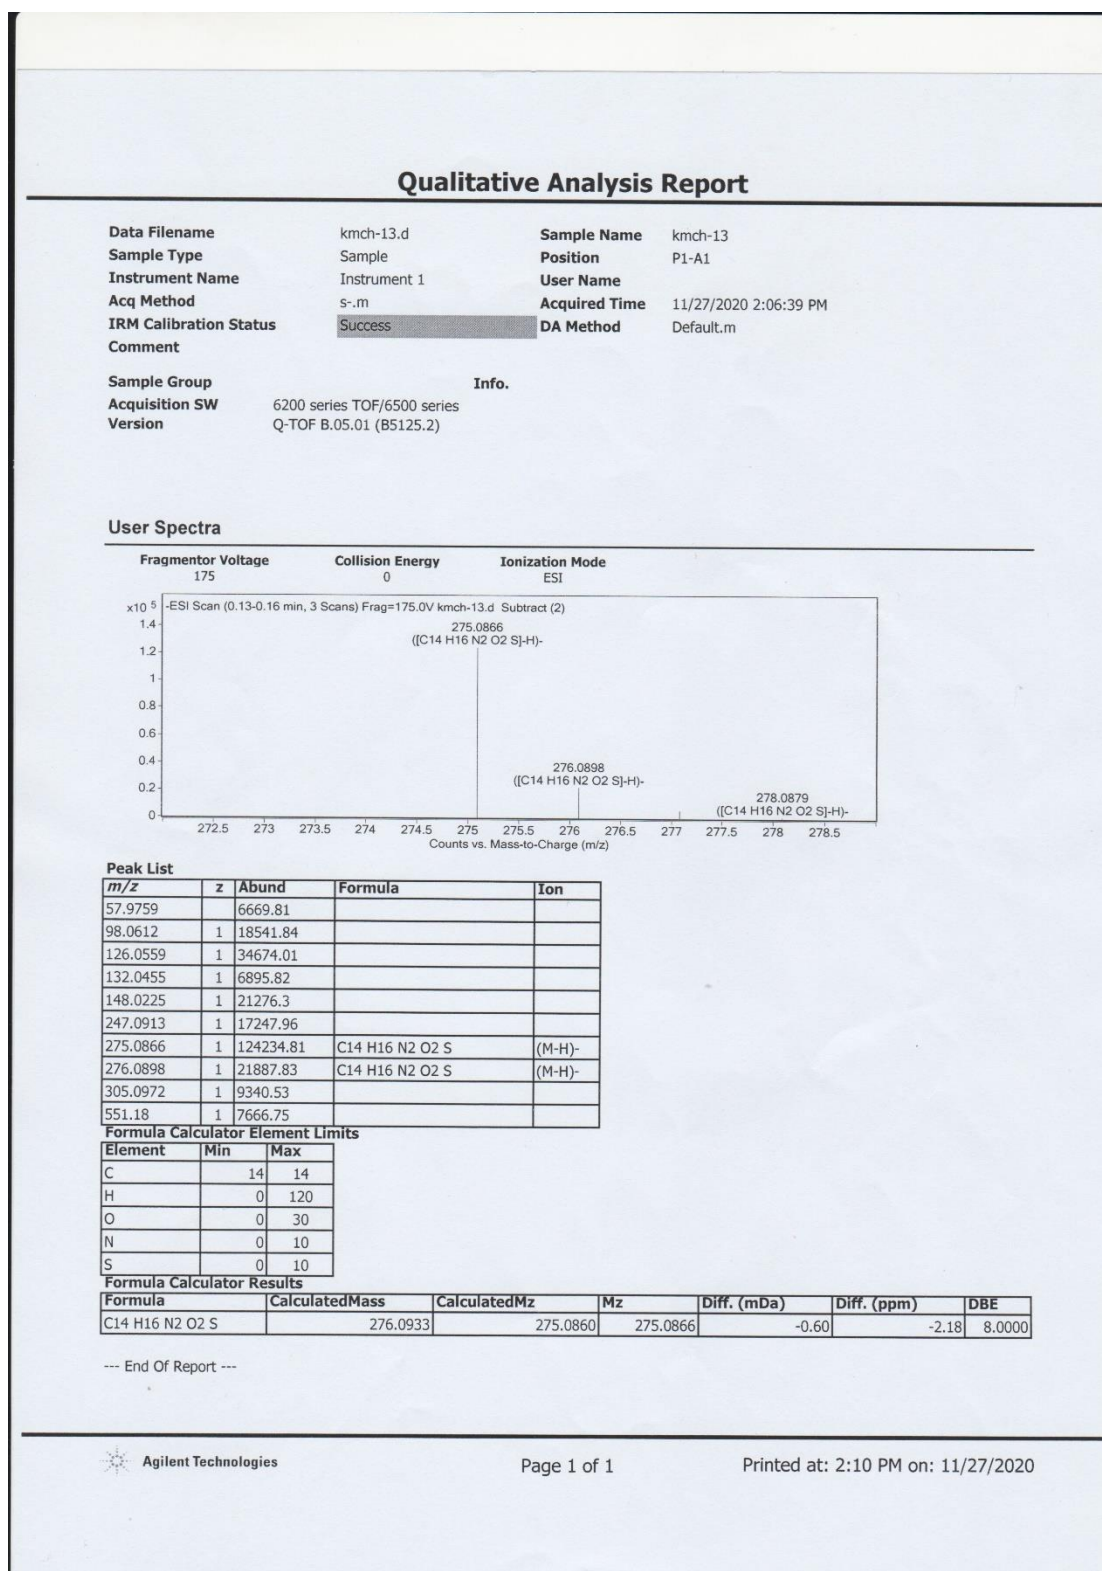

Figure S1-2 ESI-MS spectrum of **1**

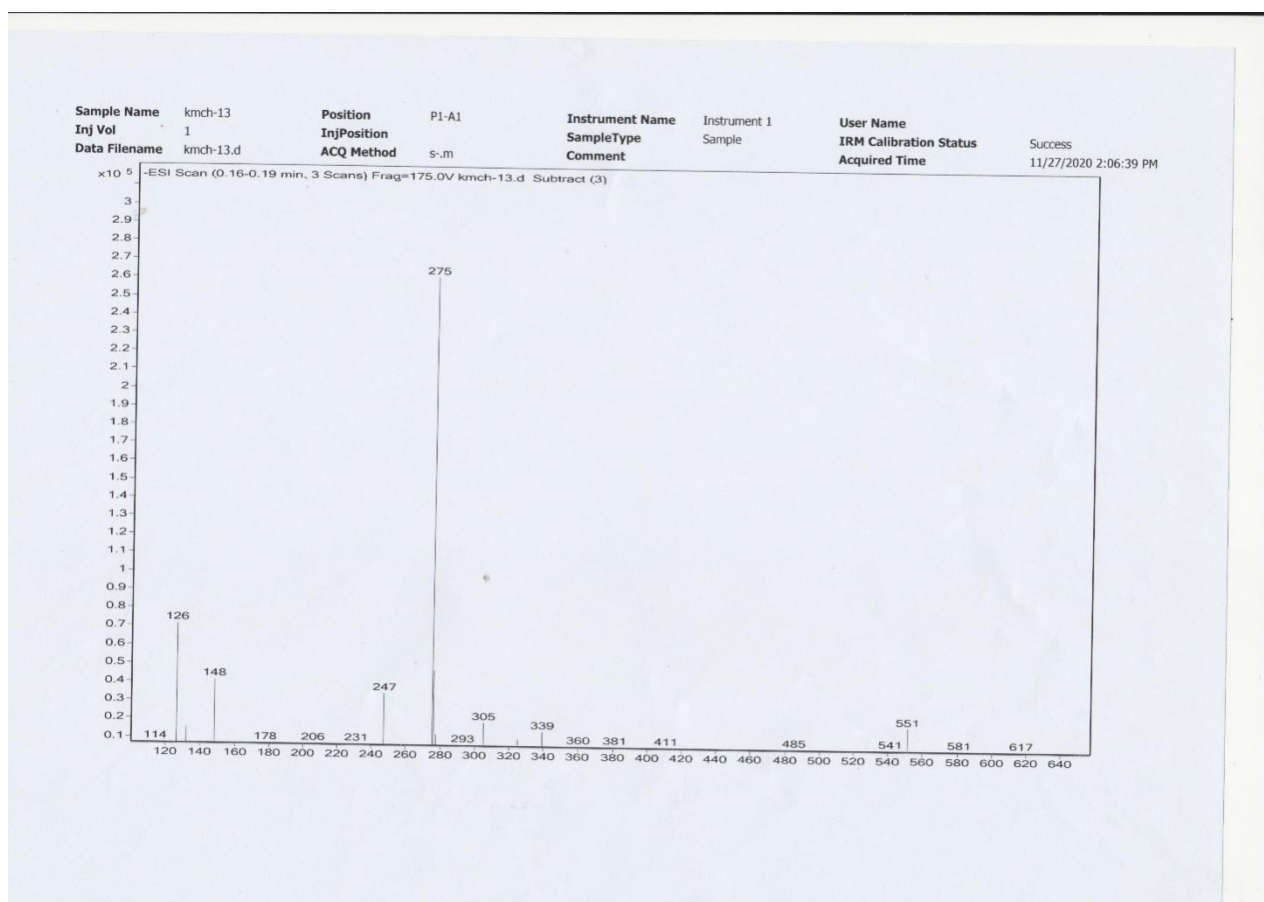

Figure S1-3 The chiral analytical HPLC chromatography of **1**

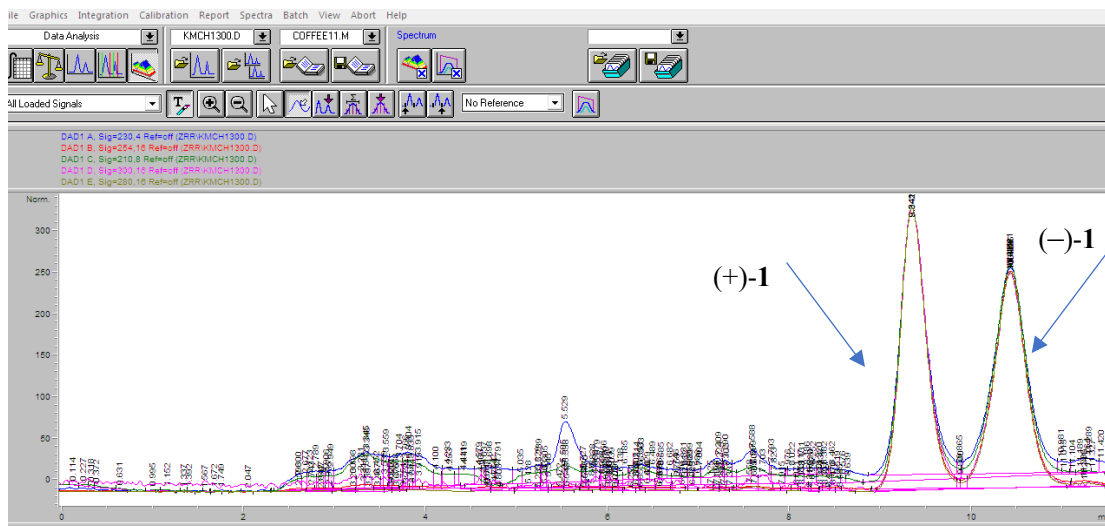

Figure S1-4.  $[\alpha]_D$  data of (+)-**1**

**Rudolph Research Analytical**

This sample was measured on an Autopol VI, Serial #91058  
Manufactured by Rudolph Research Analytical, Hackettstown, NJ, USA.

Measurement Date : Monday, 11-JAN-2021

Set Temperature : OFF

Time Delay : Disabled

Delay between Measurement : Disabled

| <u>n</u>    | <u>Average</u>   | <u>Std.Dev.</u> | <u>% RSD</u>  | <u>Maximum</u> | <u>Minimum</u> |               |              |                     |              |  |
|-------------|------------------|-----------------|---------------|----------------|----------------|---------------|--------------|---------------------|--------------|--|
| 5           | 25.43            | 0.13            | 0.51          | 25.63          | 25.32          |               |              |                     |              |  |
| <u>S.No</u> | <u>Sample ID</u> | <u>Time</u>     | <u>Result</u> | <u>Scale</u>   | <u>OR °Arc</u> | <u>WLG.nm</u> | <u>Lg.mm</u> | <u>Conc.g/100ml</u> | <u>Temp.</u> |  |
| 1           | KMCH-13-1        | 02:22:40 PM     | 25.42         | SR             | 0.0483         | 589           | 100.00       | 0.190               | 16.2         |  |
| 2           | KMCH-13-1        | 02:22:48 PM     | 25.47         | SR             | 0.0484         | 589           | 100.00       | 0.190               | 16.2         |  |
| 3           | KMCH-13-1        | 02:22:56 PM     | 25.32         | SR             | 0.0481         | 589           | 100.00       | 0.190               | 16.2         |  |
| 4           | KMCH-13-1        | 02:23:05 PM     | 25.63         | SR             | 0.0487         | 589           | 100.00       | 0.190               | 16.2         |  |
| 5           | KMCH-13-1        | 02:23:13 PM     | 25.32         | SR             | 0.0481         | 589           | 100.00       | 0.190               | 16.2         |  |

Figure S1-5.  $[\alpha]_D$  data of (–)-1

**Rudolph Research Analytical**

This sample was measured on an Autopol VI, Serial #91058  
Manufactured by Rudolph Research Analytical, Hackettstown, NJ, USA.

Measurement Date : Monday, 11-JAN-2021

Set Temperature : OFF

Time Delay : Disabled

Delay between Measurement : Disabled

| <u>n</u>    | <u>Average</u>   | <u>Std.Dev.</u> | <u>% RSD</u>  | <u>Maximum</u> | <u>Minimum</u> |               |              |                     |              |  |
|-------------|------------------|-----------------|---------------|----------------|----------------|---------------|--------------|---------------------|--------------|--|
| 5           | -16.02           | 0.14            | -0.87         | -15.89         | -16.22         |               |              |                     |              |  |
| <u>S.No</u> | <u>Sample ID</u> | <u>Time</u>     | <u>Result</u> | <u>Scale</u>   | <u>OR °Arc</u> | <u>WLG.nm</u> | <u>Lg.mm</u> | <u>Conc.g/100ml</u> | <u>Temp.</u> |  |
| 1           | KMCH-13-2        | 02:35:46 PM     | -16.11        | SR             | -0.0145        | 589           | 100.00       | 0.090               | 16.0         |  |
| 2           | KMCH-13-2        | 02:35:54 PM     | -16.22        | SR             | -0.0146        | 589           | 100.00       | 0.090               | 16.0         |  |
| 3           | KMCH-13-2        | 02:36:02 PM     | -15.89        | SR             | -0.0143        | 589           | 100.00       | 0.090               | 16.0         |  |
| 4           | KMCH-13-2        | 02:36:11 PM     | -16.00        | SR             | -0.0144        | 589           | 100.00       | 0.090               | 16.0         |  |
| 5           | KMCH-13-2        | 02:36:19 PM     | -15.89        | SR             | -0.0143        | 589           | 100.00       | 0.090               | 16.0         |  |

Figure S1-6. CD and UV spectrum of (+)-**1** in MeOH

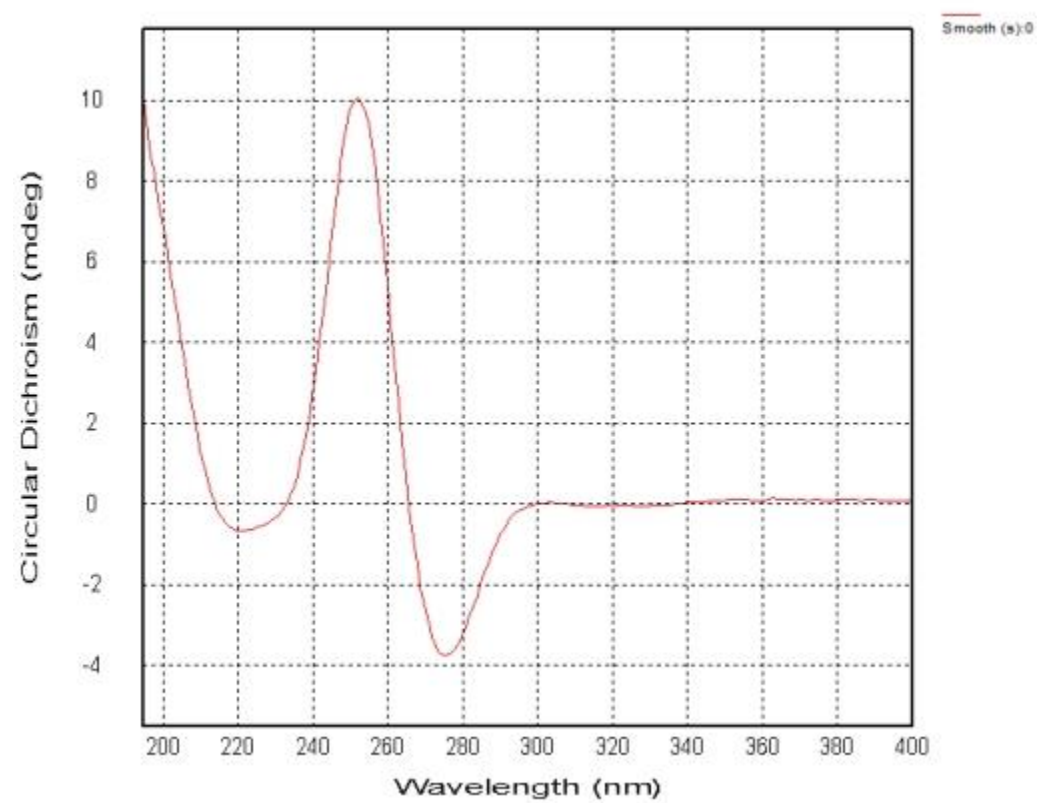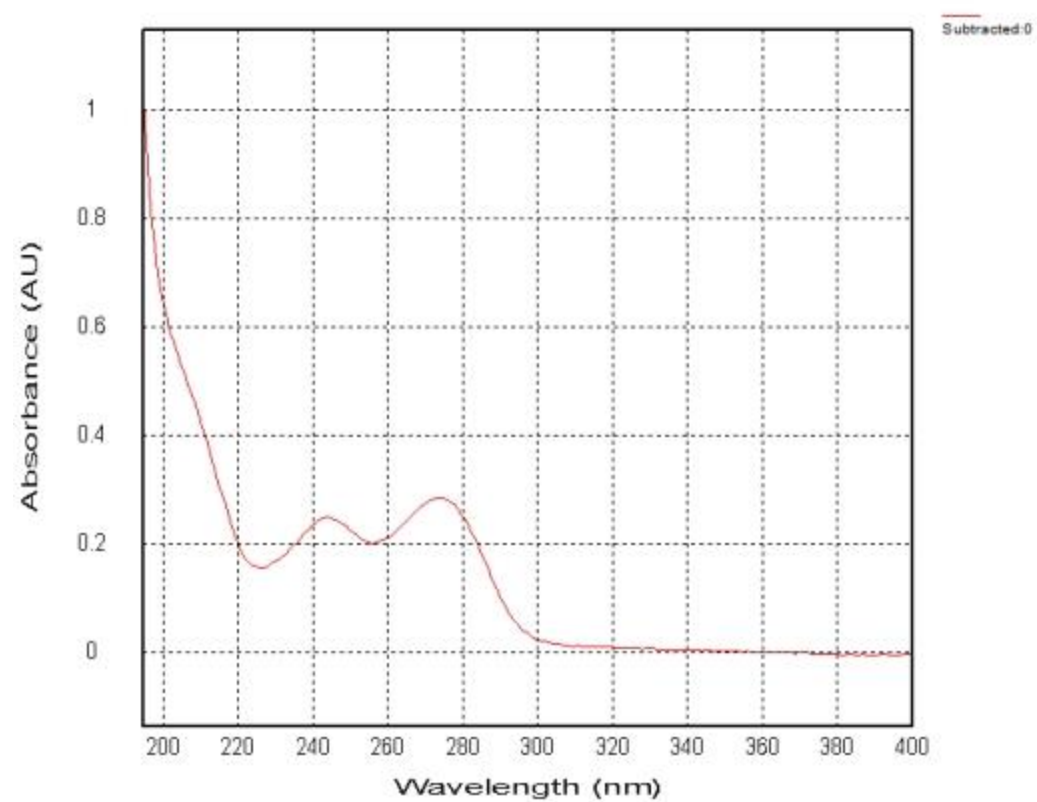



File: KMCH-13-1-1mm (195-400 nm) 20122305.dsx

ProBinaryX

Attributes :

- Time Stamp :Wed Dec 23 18:26:31 2020

- File ID : {4E633C76-CEAE-4aa8-A518-7124A8CDF20B}

- Is CFR Compliant : false

- Original data has not been modified.

Remarks:

- User: CD

- Date: 2020/12/23

- Instrument: 0547

- DetectorType: LAAPD

- DichOS Calibration Correction Curve: 0547/2

- HV (CDDC channel): 0 v

- Time per point: 1 s

- Description: Sample 1

- Concentration: 0.0840mg/mL MeOH

- Pathlength: 1 mm

- Temperature: 20°C

Settings:

- Time-per-point: 1 s (25us x 40000)

- SE

- Wavelength: 195nm - 400nm

- Step Size: 1nm

- Bandwidth: 1nm

Figure S1-7. CD and UV spectrum of (–)-**1** in MeOH

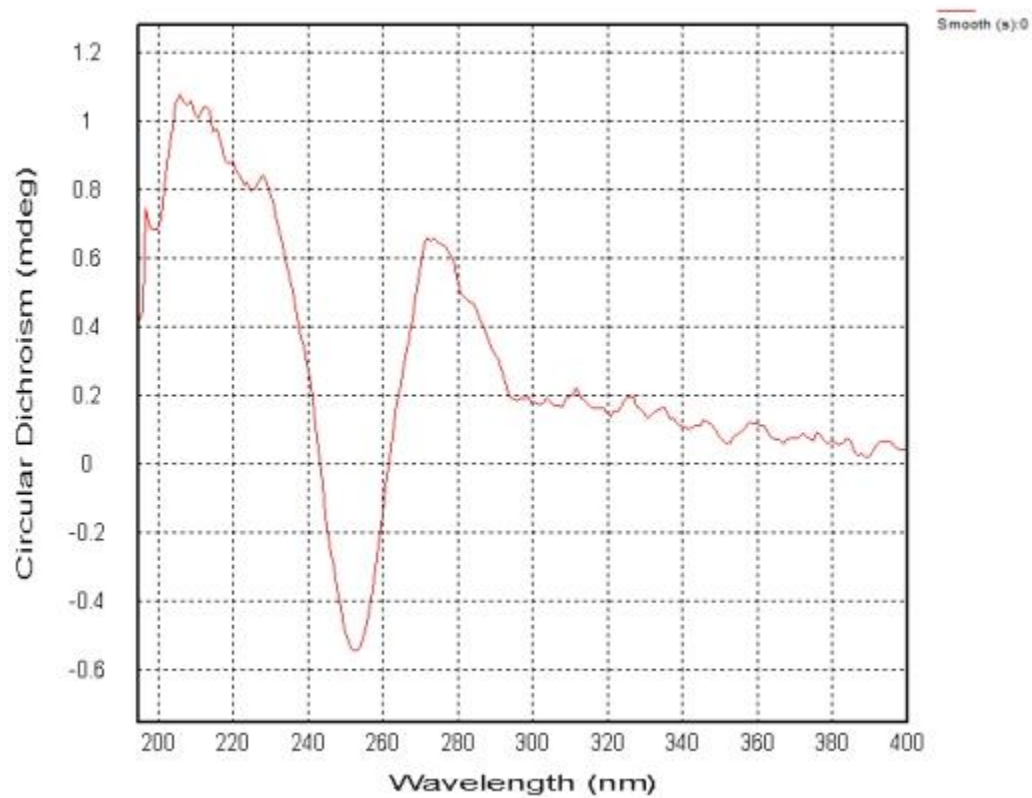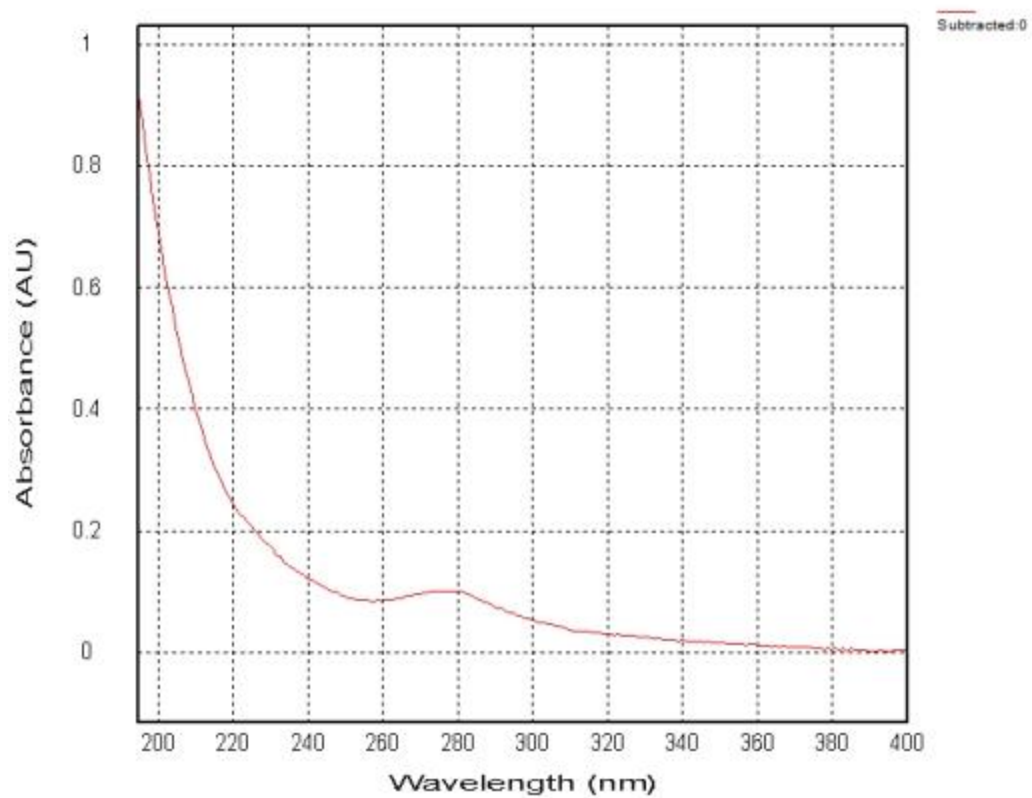

File: KMCH-13-2-1mm (195-400 nm) 20122515.dsx

ProBinaryX

Attributes :

- Time Stamp :Fri Dec 25 15:05:27 2020

- File ID : {1DADB795-454C-4c46-89C4-D53819D1C919}

- Is CFR Compliant : false

- Original data has not been modified.

Remarks:

- User: CD

- Date: 2020/12/25

- Instrument: 0547

- DetectorType: LAAPD

- DichOS Calibration Correction Curve: 0547/2

- HV (CDDC channel): 0 v

- Time per point: 1 s

- Description: Sample 1

- Concentration: 0.2100mg/mL MeOH

- Pathlength: 1 mm

- Temperature: 20°C

Settings:

- Time-per-point: 1s (25us x 40000)

- SE

- Wavelength: 195nm - 400nm

- Step Size: 1nm

- Bandwidth: 1nm

Figure S1-8.  $^1\text{H}$  NMR spectrum of **1** in  $\text{CDCl}_3$  (600 MHz)

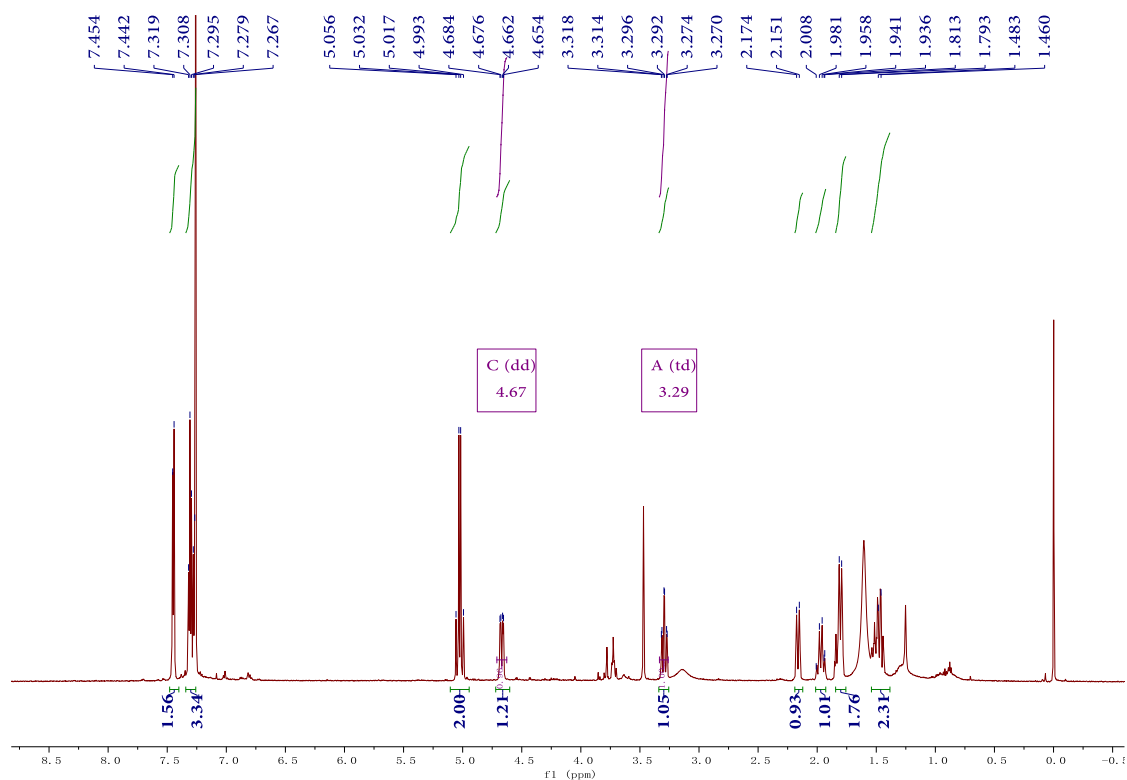

Figure S1-9.  $^{13}\text{C}$  NMR spectrum of **1** in  $\text{CDCl}_3$  (150 MHz)

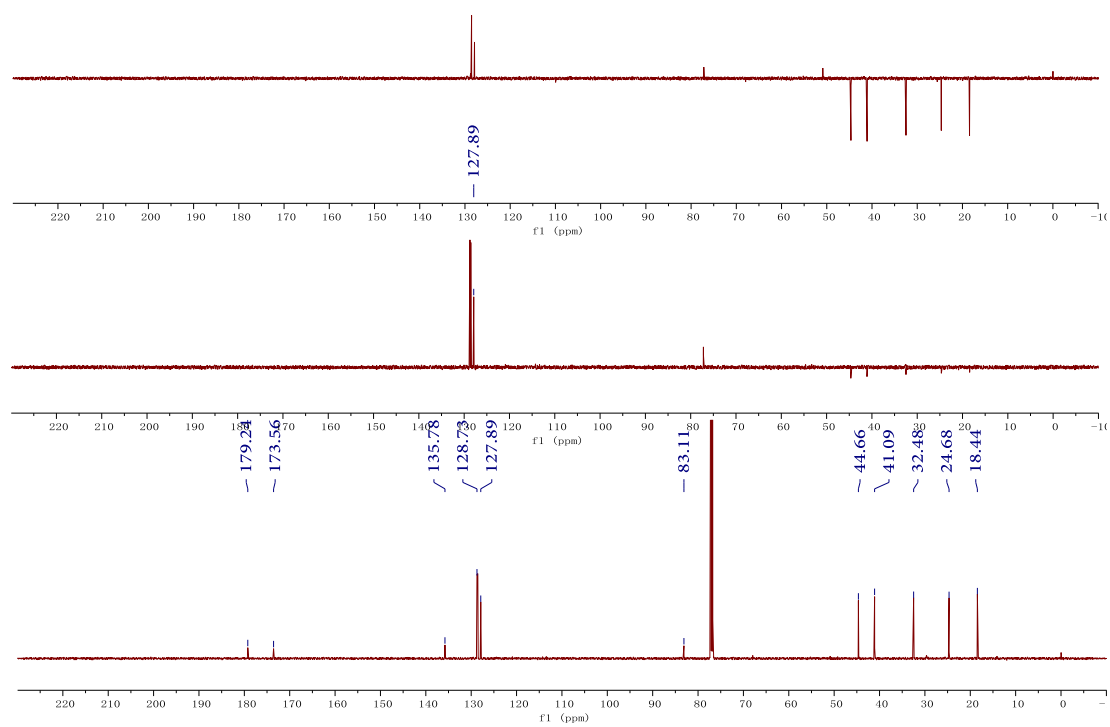

Figure S1-10.  $^1\text{H}$ - $^1\text{H}$  COSY spectrum of **1** in  $\text{CDCl}_3$  (600 MHz)

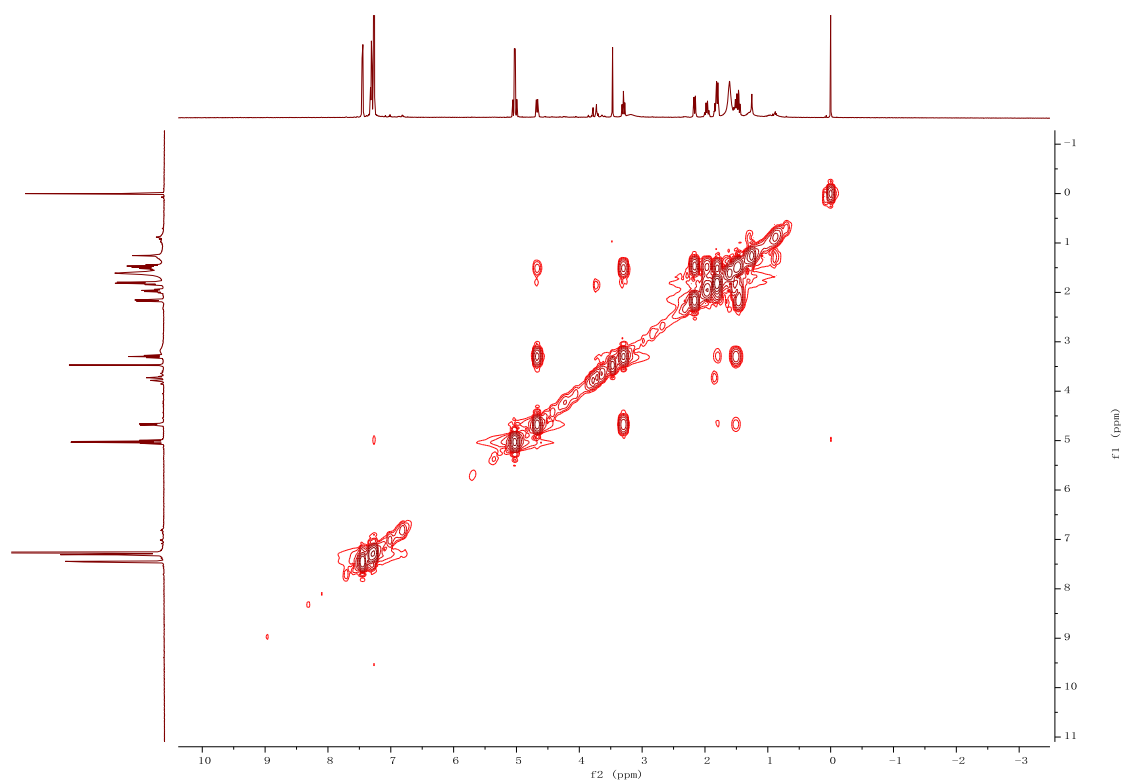

Figure S1-11. HSQC spectrum of **1** in  $\text{CDCl}_3$  (600 MHz)

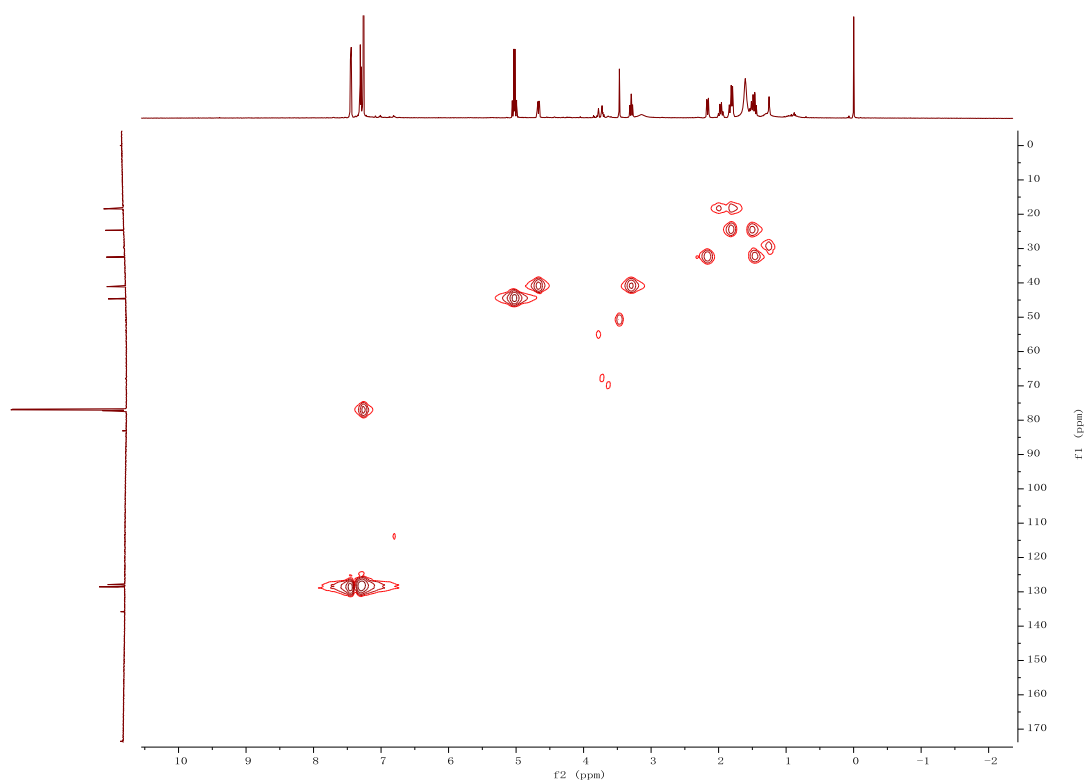

Figure S1-12 HMBC spectrum of **1** in CDCl<sub>3</sub> (600 MHz)

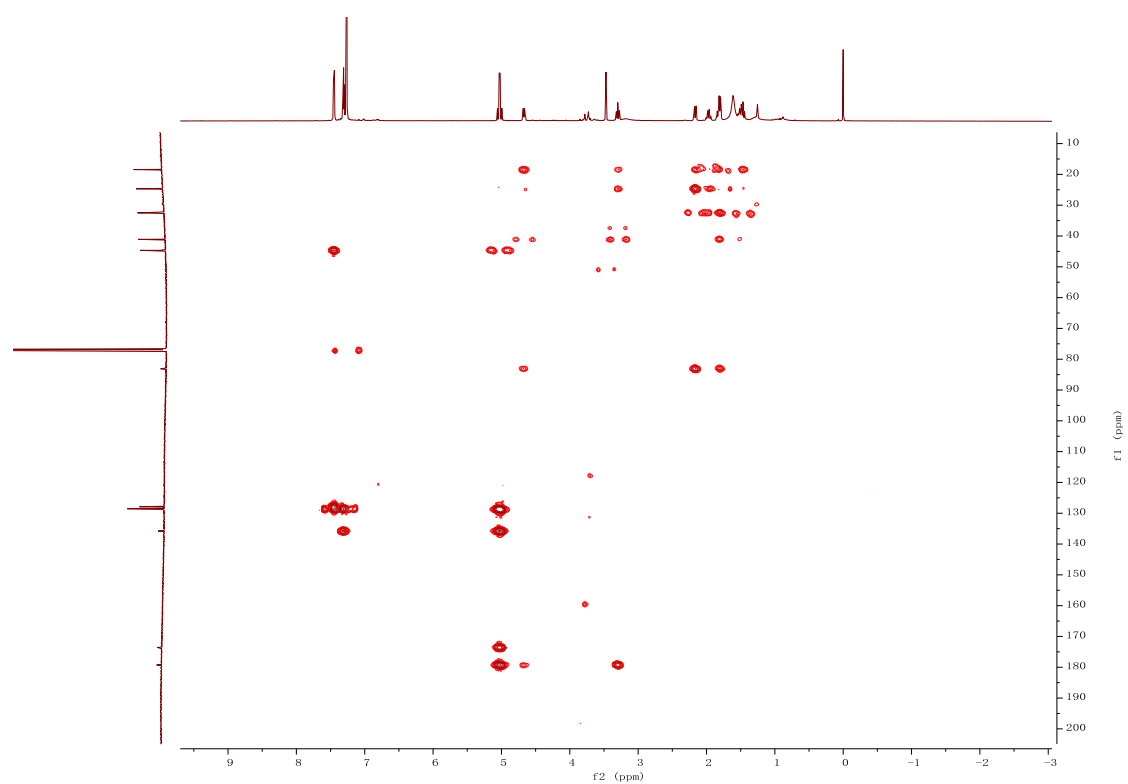

Figure S2-1. HR-ESI-MS spectrum of 2

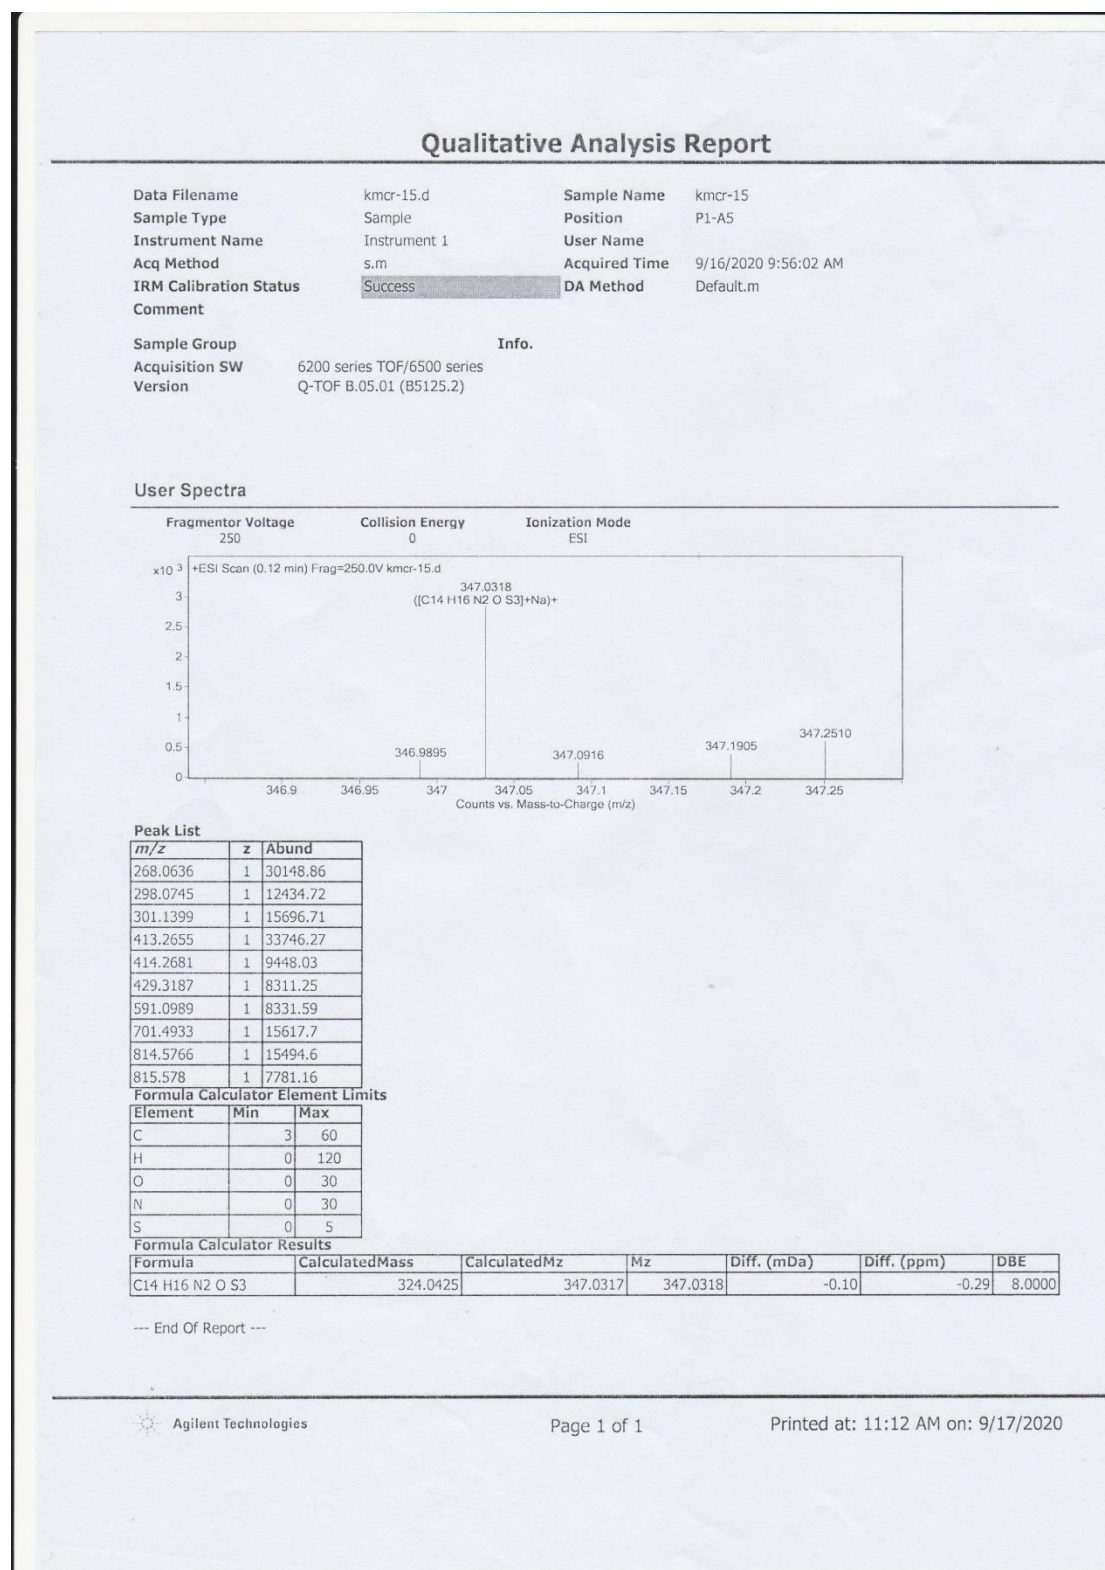

Figure S2-2 ESI-MS spectrum of **2**

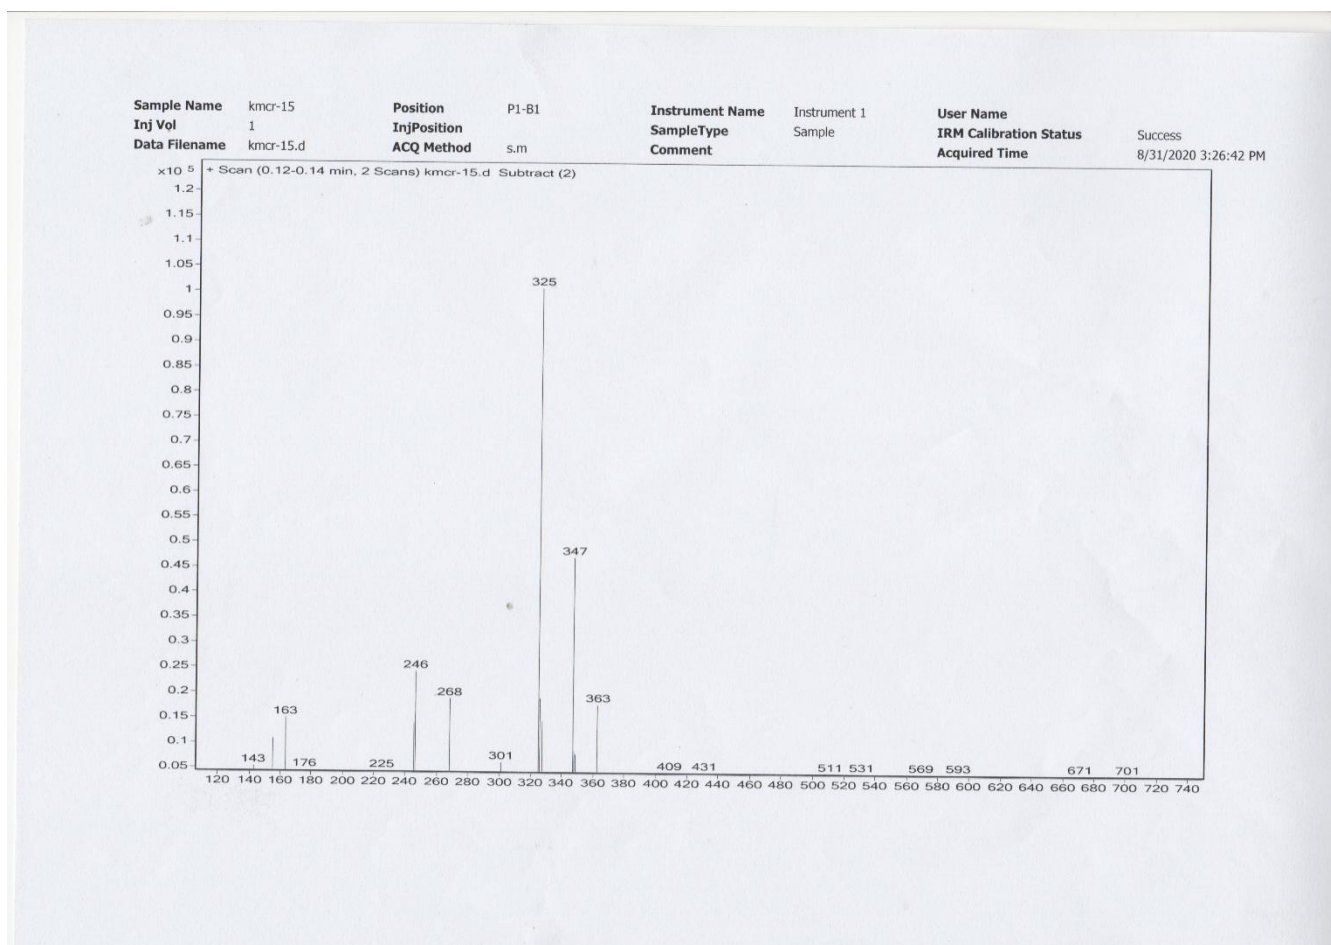

Figure S2-3 The chiral analytical HPLC chromatography of **2**

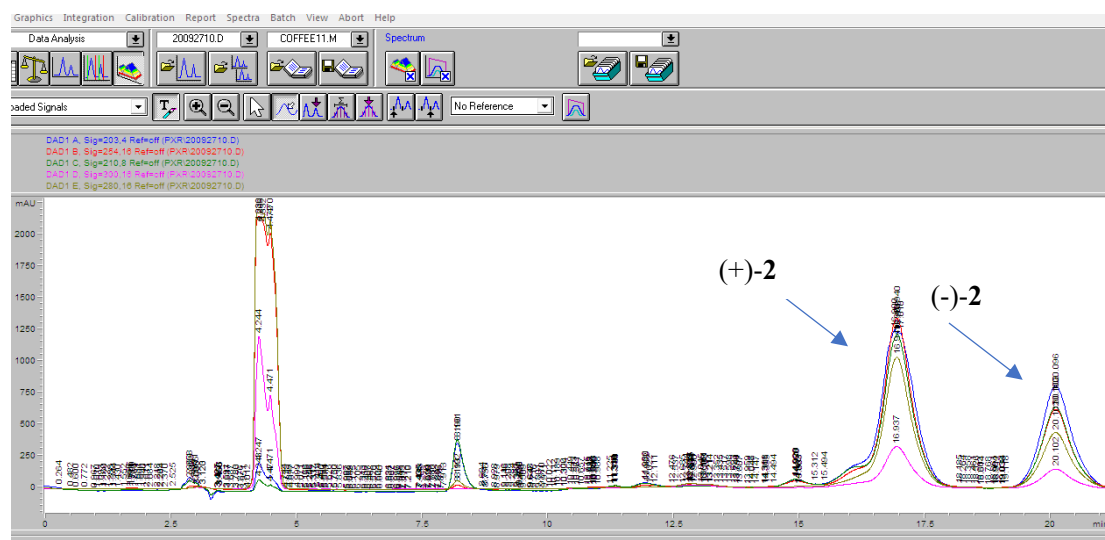



Figure S2-4.  $[\alpha]_D$  data of (+)-2

**Rudolph Research Analytical**

This sample was measured on an Autopol VI, Serial #91058  
Manufactured by Rudolph Research Analytical, Hackettstown, NJ, USA.

Measurement Date : Monday, 12-OCT-2020

Set Temperature : OFF

Time Delay : Disabled

Delay between Measurement : Disabled

| <u>n</u>    | <u>Average</u>   | <u>Std.Dev.</u> | <u>% RSD</u>  | <u>Maximum</u> | <u>Minimum</u> |               |              |                     |              |  |
|-------------|------------------|-----------------|---------------|----------------|----------------|---------------|--------------|---------------------|--------------|--|
| 5           | 24.04            | 0.19            | 0.79          | 24.32          | 23.79          |               |              |                     |              |  |
| <u>S.No</u> | <u>Sample ID</u> | <u>Time</u>     | <u>Result</u> | <u>Scale</u>   | <u>OR °Arc</u> | <u>WLG.nm</u> | <u>Lg.mm</u> | <u>Conc.g/100ml</u> | <u>Temp.</u> |  |
| 1           | KMCR-15-1        | 02:28:09 PM     | 24.05         | SR             | 0.0457         | 589           | 100.00       | 0.190               | 24.9         |  |
| 2           | KMCR-15-1        | 02:28:18 PM     | 24.05         | SR             | 0.0457         | 589           | 100.00       | 0.190               | 24.9         |  |
| 3           | KMCR-15-1        | 02:28:26 PM     | 24.32         | SR             | 0.0462         | 589           | 100.00       | 0.190               | 24.9         |  |
| 4           | KMCR-15-1        | 02:28:34 PM     | 24.00         | SR             | 0.0456         | 589           | 100.00       | 0.190               | 24.9         |  |
| 5           | KMCR-15-1        | 02:28:42 PM     | 23.79         | SR             | 0.0452         | 589           | 100.00       | 0.190               | 24.9         |  |

Figure S2-5.  $[\alpha]_D$  data of (–)-2

**Rudolph Research Analytical**

This sample was measured on an Autopol VI, Serial #91058  
Manufactured by Rudolph Research Analytical, Hackettstown, NJ, USA.

Measurement Date : Monday, 12-OCT-2020

Set Temperature : OFF

Time Delay : Disabled

Delay between Measurement : Disabled

| <u>n</u>    | <u>Average</u>   | <u>Std.Dev.</u> | <u>% RSD</u>  | <u>Maximum</u> | <u>Minimum</u> |               |              |                     |              |  |
|-------------|------------------|-----------------|---------------|----------------|----------------|---------------|--------------|---------------------|--------------|--|
| 5           | -10.63           | 0.15            | -1.41         | -10.44         | -10.81         |               |              |                     |              |  |
| <u>S.No</u> | <u>Sample ID</u> | <u>Time</u>     | <u>Result</u> | <u>Scale</u>   | <u>OR °Arc</u> | <u>WLG.nm</u> | <u>Lg.mm</u> | <u>Conc.g/100ml</u> | <u>Temp.</u> |  |
| 1           | KMCR-15-2        | 02:42:56 PM     | -10.81        | SR             | -0.0173        | 589           | 100.00       | 0.160               | 24.7         |  |
| 2           | KMCR-15-2        | 02:43:04 PM     | -10.69        | SR             | -0.0171        | 589           | 100.00       | 0.160               | 24.7         |  |
| 3           | KMCR-15-2        | 02:43:12 PM     | -10.44        | SR             | -0.0167        | 589           | 100.00       | 0.160               | 24.8         |  |
| 4           | KMCR-15-2        | 02:43:21 PM     | -10.69        | SR             | -0.0171        | 589           | 100.00       | 0.160               | 24.8         |  |
| 5           | KMCR-15-2        | 02:43:29 PM     | -10.50        | SR             | -0.0168        | 589           | 100.00       | 0.160               | 24.8         |  |

Figure S2-6. CD and UV spectrum of (+)-**2** in MeOH

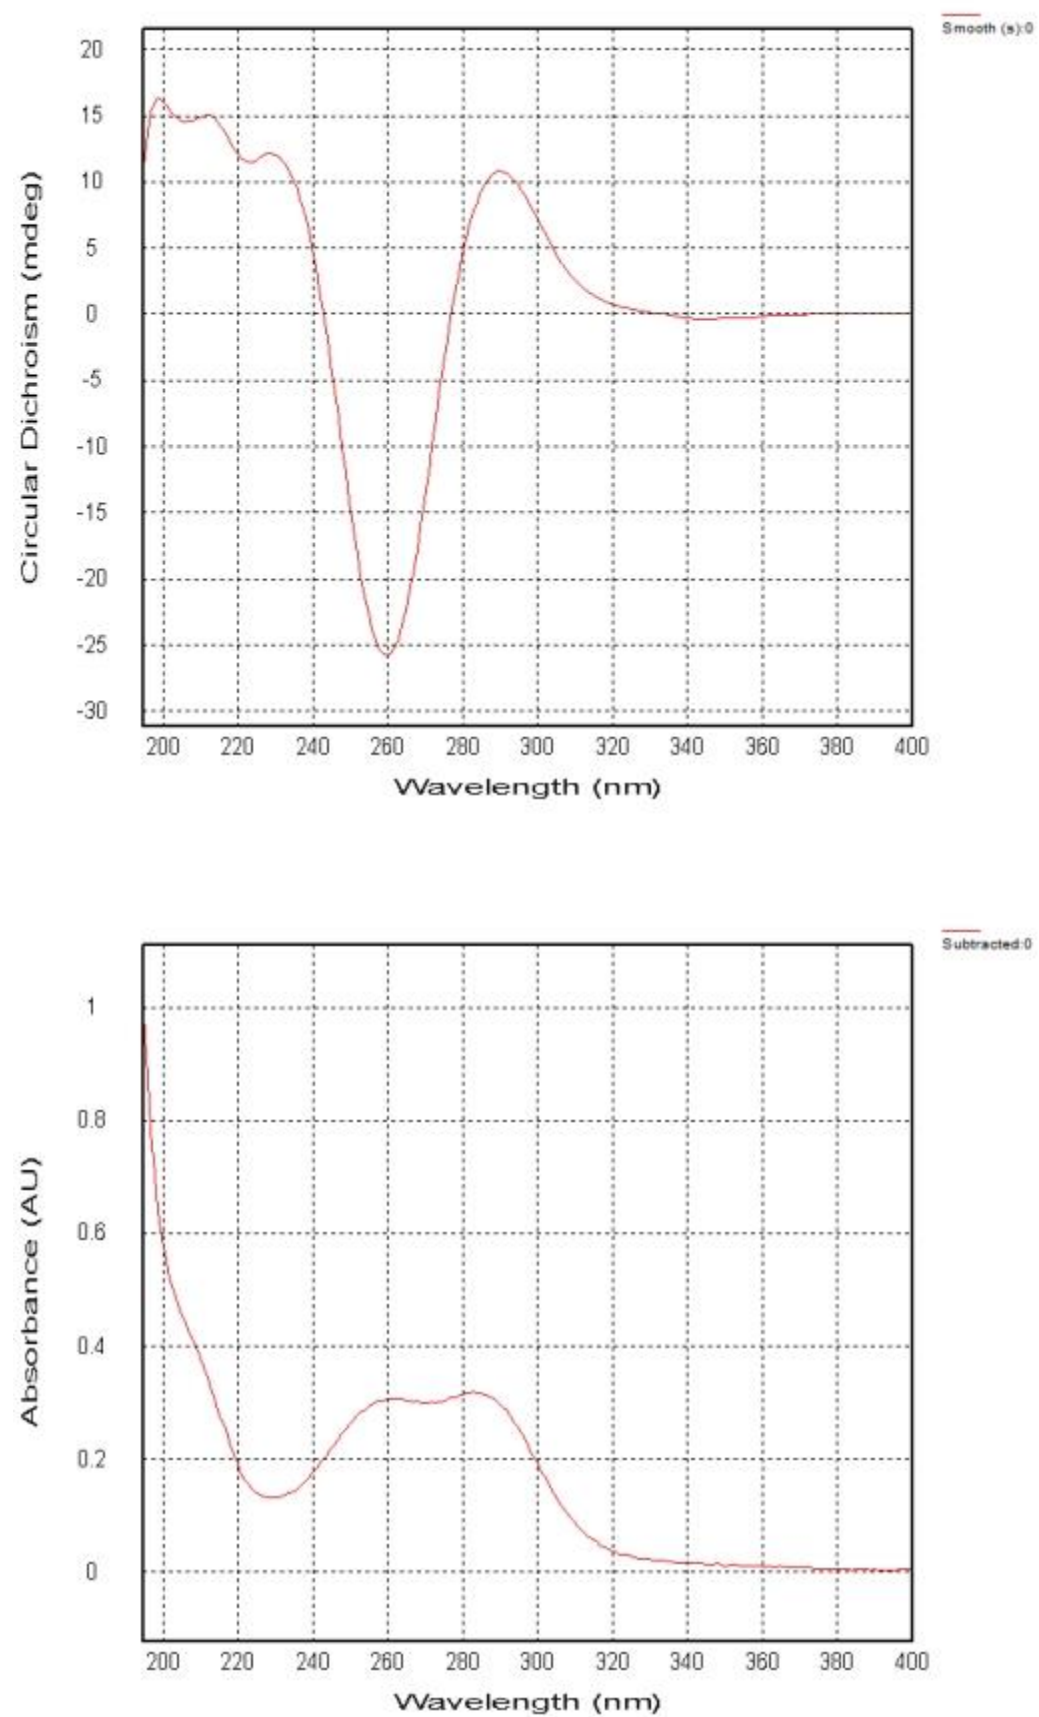

File: KMCR-15-1-1mm (195-400 nm) 20101317.dsx

ProBinaryX

Attributes :

- Time Stamp :Tue Oct 13 14:17:23 2020

- File ID : {0D1C595B-753D-4a0d-B783-C3CD5203F4AA}

- Is CFR Compliant : false

- Original data has not been modified.

Remarks:

- User: CD

- Date: 2020/10/13

- Instrument: 0547

- DetectorType: LAAPD

- DichOS Calibration Correction Curve: 0547/2

- HV (CDDC channel): 0 v

- Time per point: 1 s

- Description: Sample 1

- Concentration: 0.0821mg/mL MeOH

- Pathlength: 1 mm

- Temperature: 20°C

Settings:

- Time-per-point: 1 s (25us x 40000)

- SE

- Wavelength: 195nm - 400nm

- Step Size: 1nm

- Bandwidth: 1nm

Figure S2-7. CD and UV spectrum of (–)-**2** in MeOH

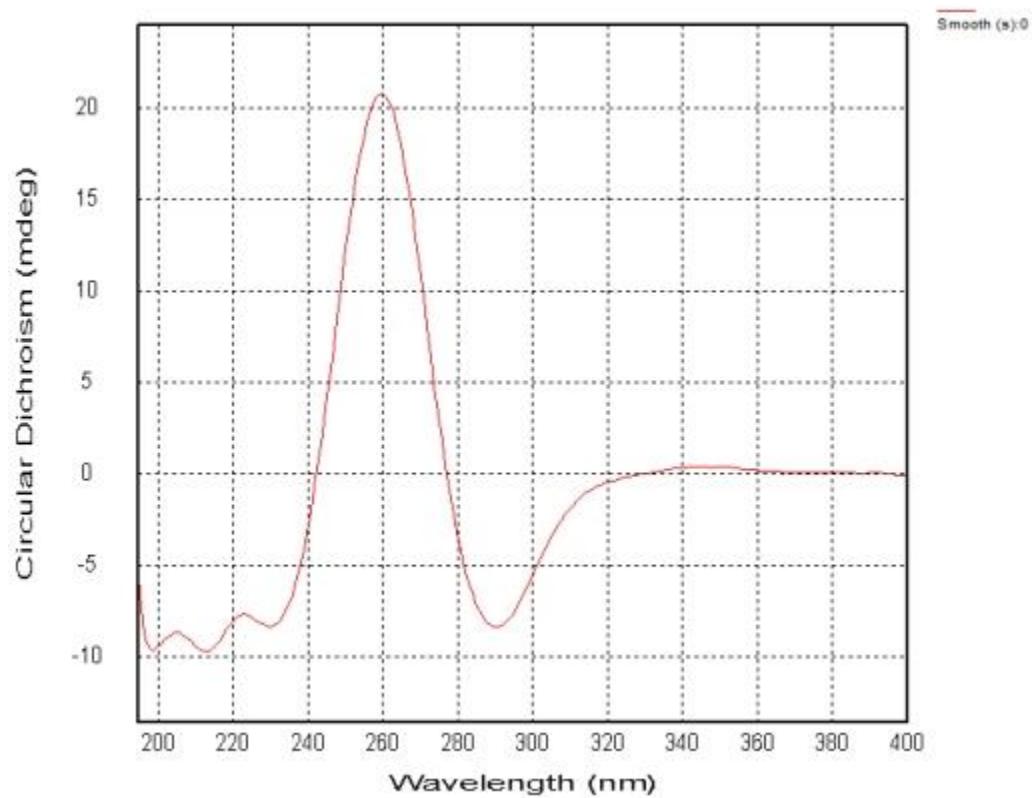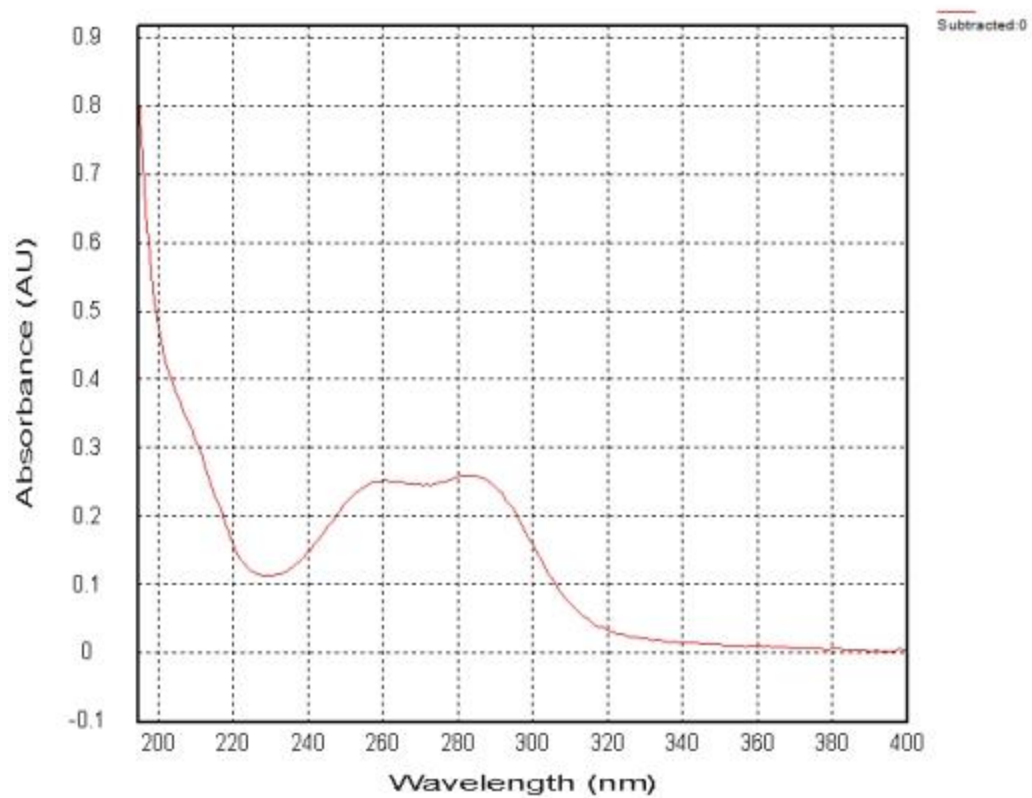

File: KMCR-15-2-1mm (195-400 nm) 20101318.dsx

ProBinaryX

Attributes :

- Time Stamp :Tue Oct 13 14:34:07 2020

- File ID : {DC13B8B9-40B0-43c7-951A-22B86084DB5F}

- Is CFR Compliant : false

- Original data has not been modified.

Remarks:

- User: CD

- Date: 2020/10/13

- Instrument: 0547

- DetectorType: LAAPD

- DichOS Calibration Correction Curve: 0547/2

- HV (CDDC channel): 0 v

- Time per point: 1 s

- Description: Sample 1

- Concentration: 0.0576mg/mL MeOH

- Pathlength: 1 mm

- Temperature: 20°C

Settings:

- Time-per-point: 1s (25us x 40000)

- SE

- Wavelength: 195nm - 400nm

- Step Size: 1nm

- Bandwidth: 1nm

Figure S2-8.  $^1\text{H}$  NMR spectrum of **2** in  $\text{CDCl}_3$  (600 MHz)

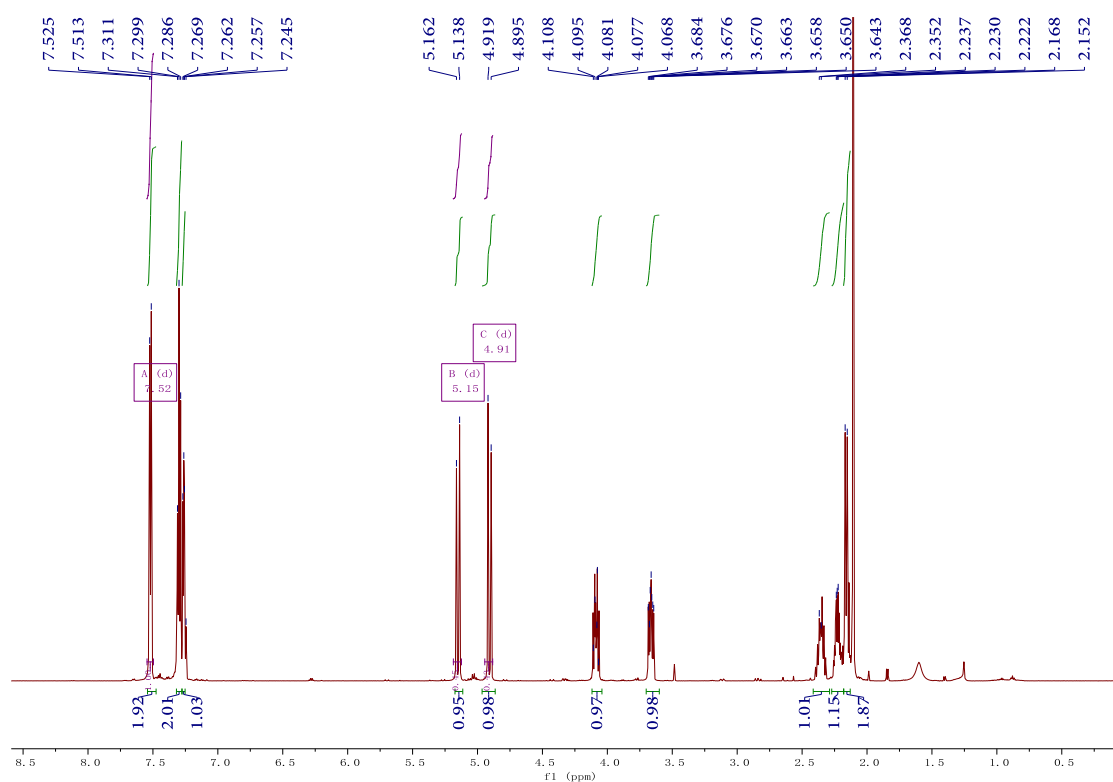

Figure S2-9.  $^{13}\text{C}$  NMR spectrum of **2** in  $\text{CDCl}_3$  (150 MHz)

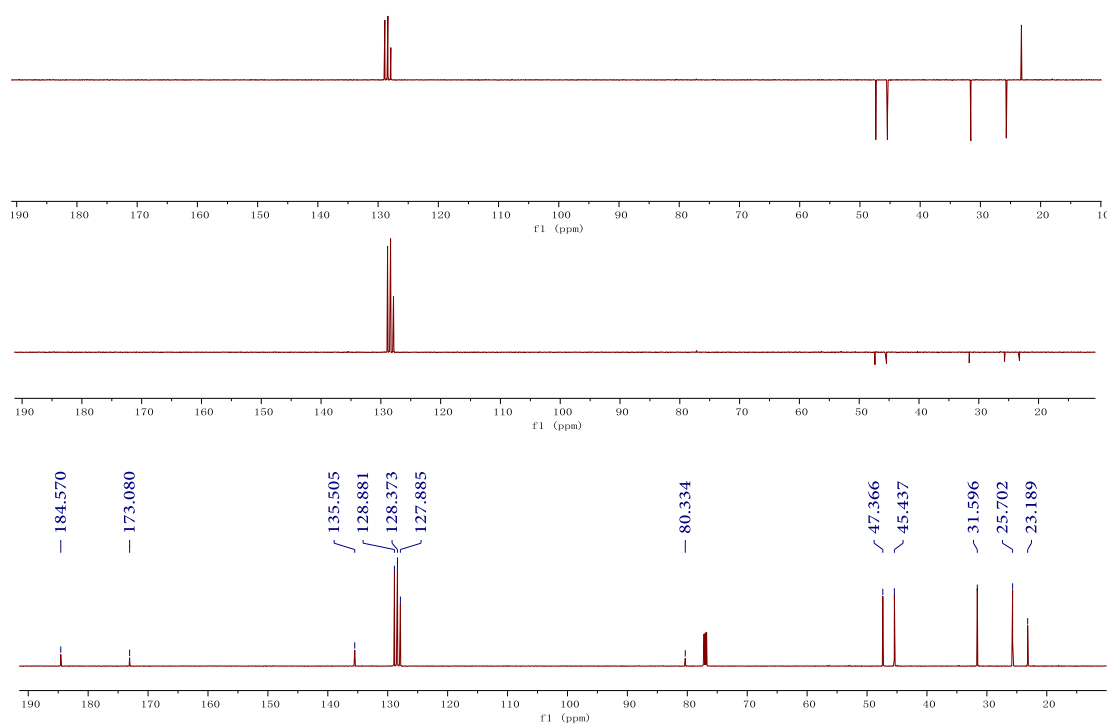

Figure S2-10.  $^1\text{H}$ - $^1\text{H}$  COSY spectrum of **2** in  $\text{CDCl}_3$  (600 MHz)

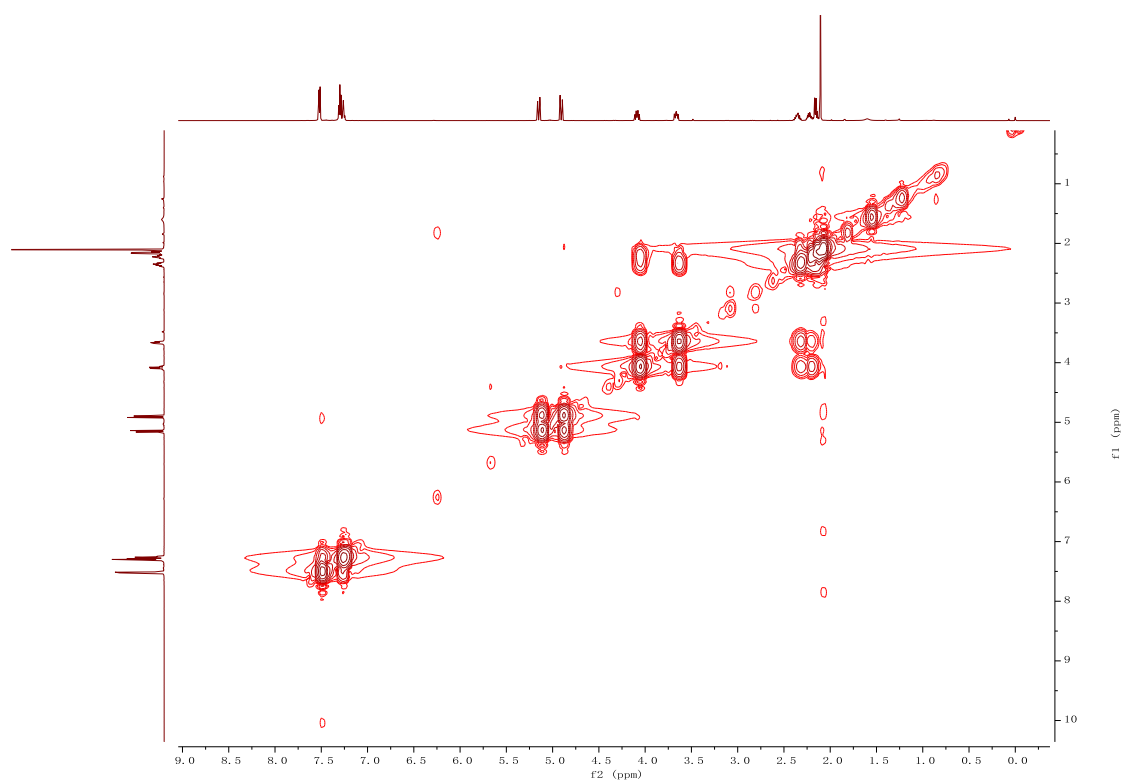

Figure S2-11. HSQC spectrum of **2** in  $\text{CDCl}_3$  (600 MHz)

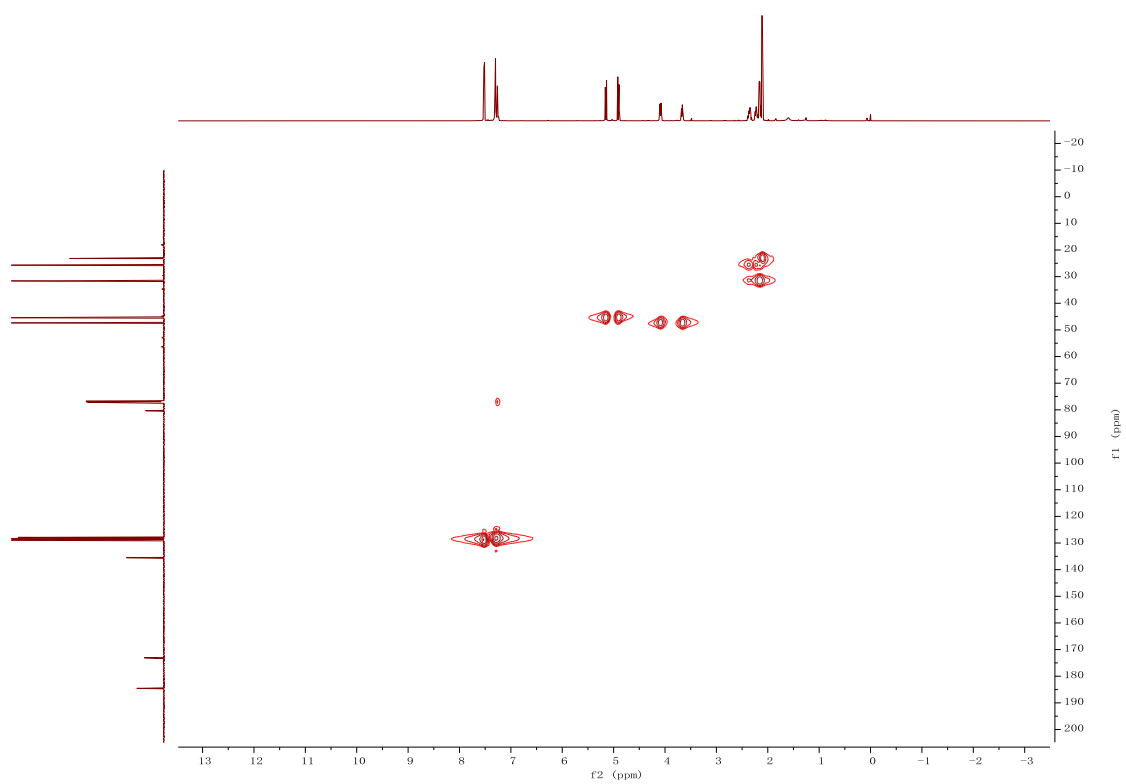

Figure S2-12 HMBC spectrum of **2** in CDCl<sub>3</sub> (600 MHz)

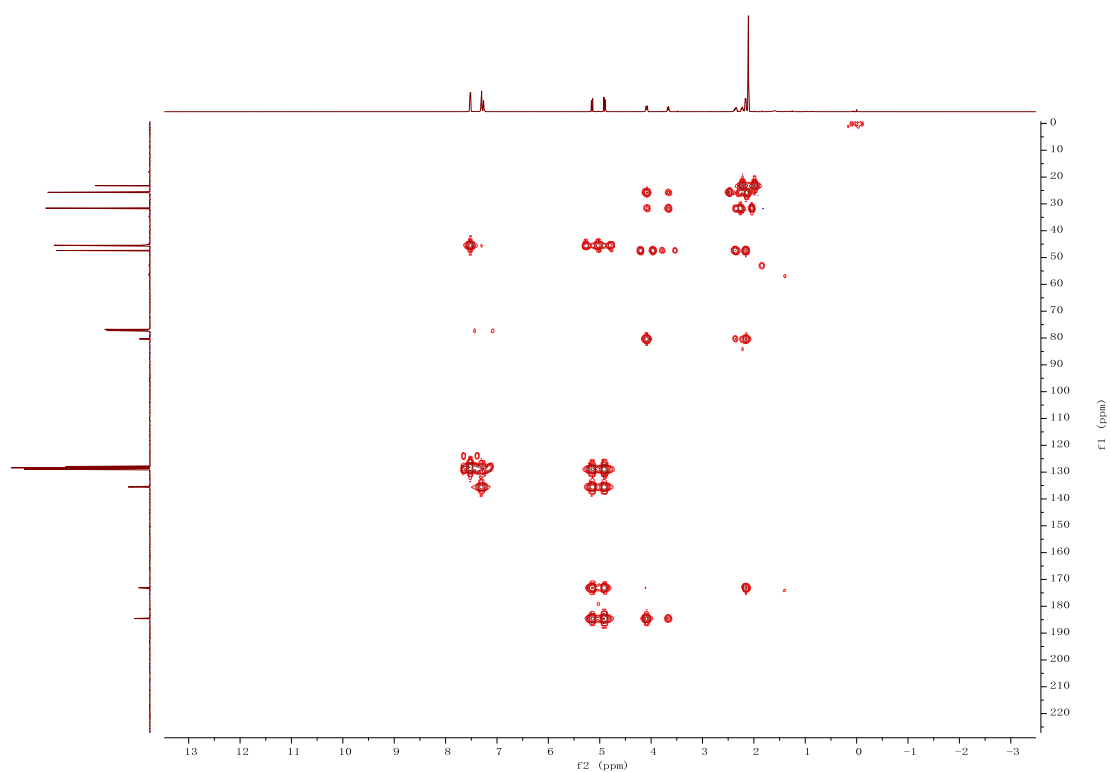



Figure S3-1. HR-ESI-MS spectrum of **3**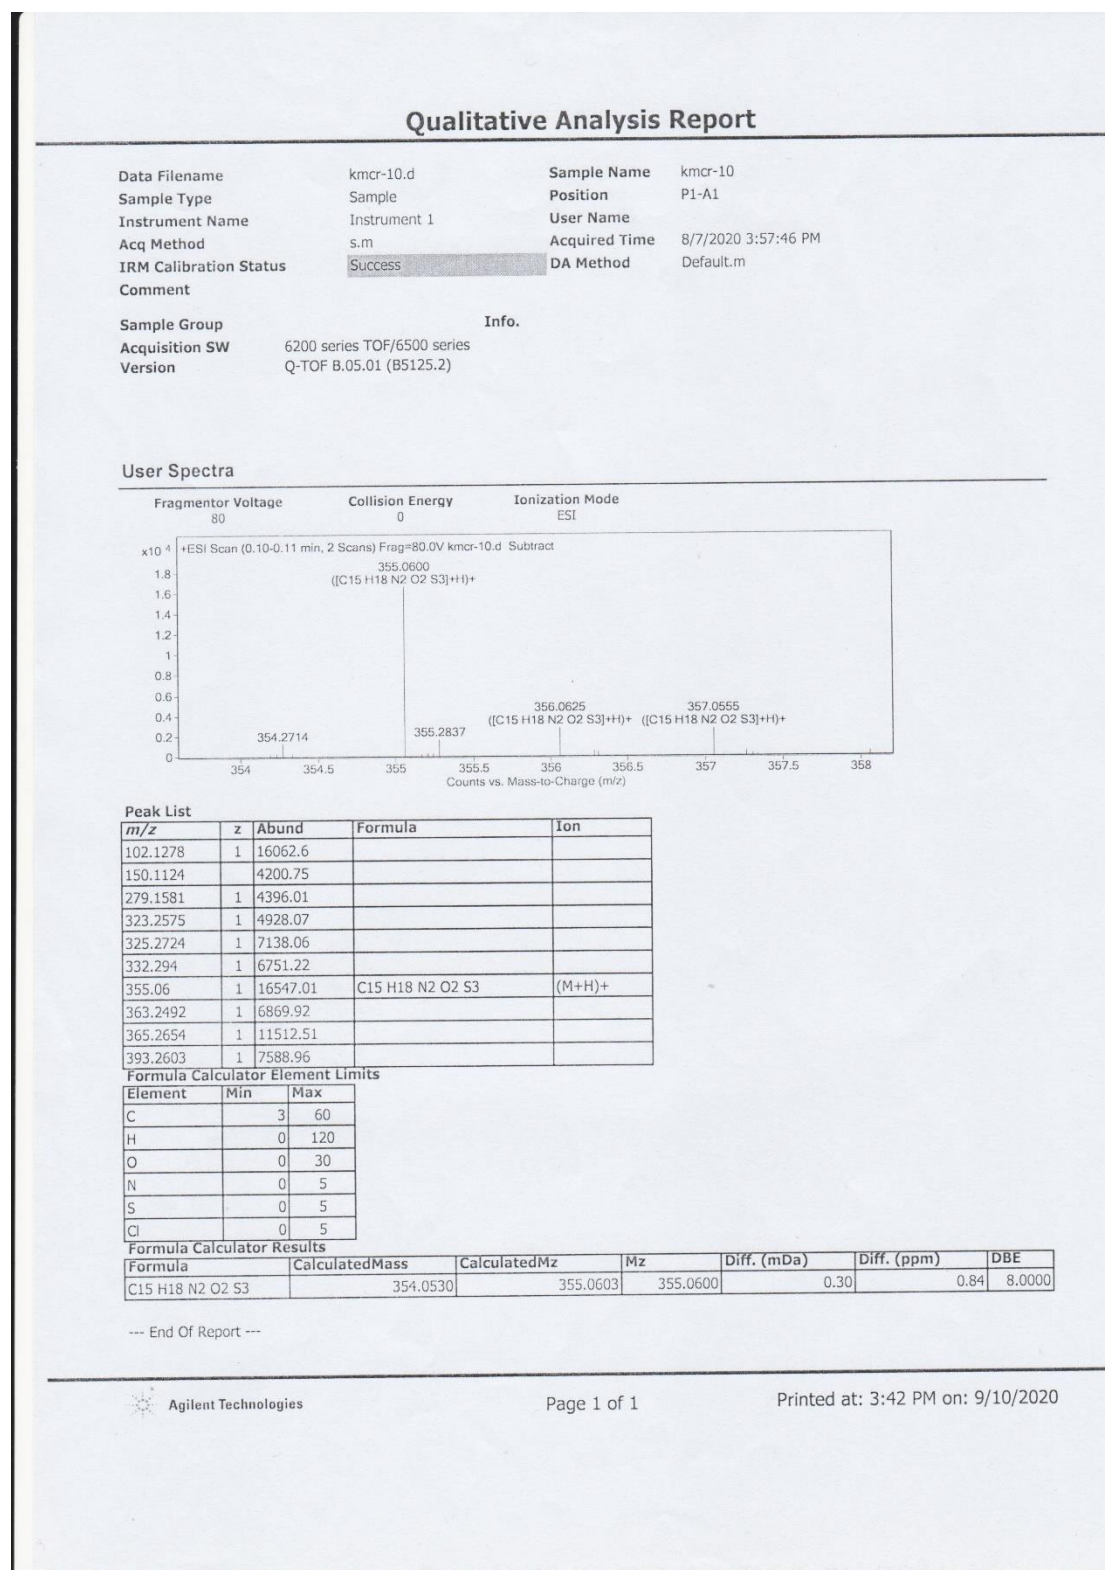

Figure S3-2. ESI-MS spectrum of **3**

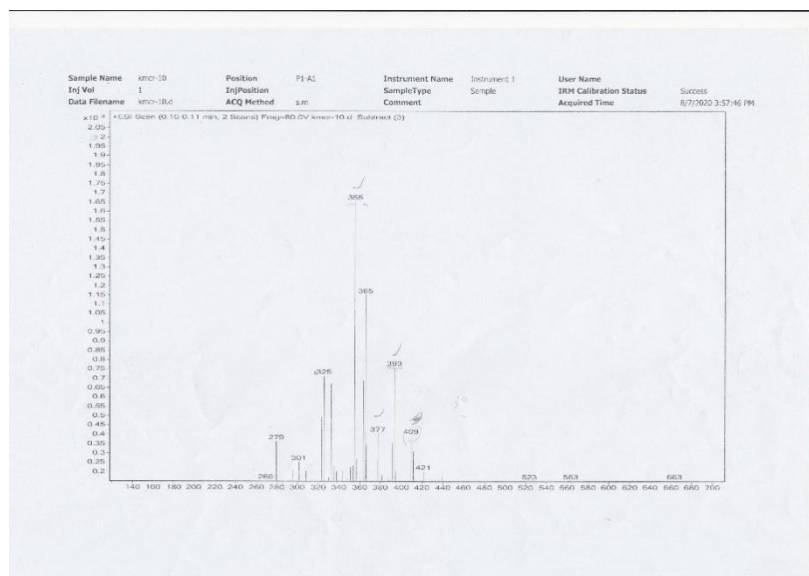

Figure S3-2 The chiral analytical HPLC chromatography of **3**

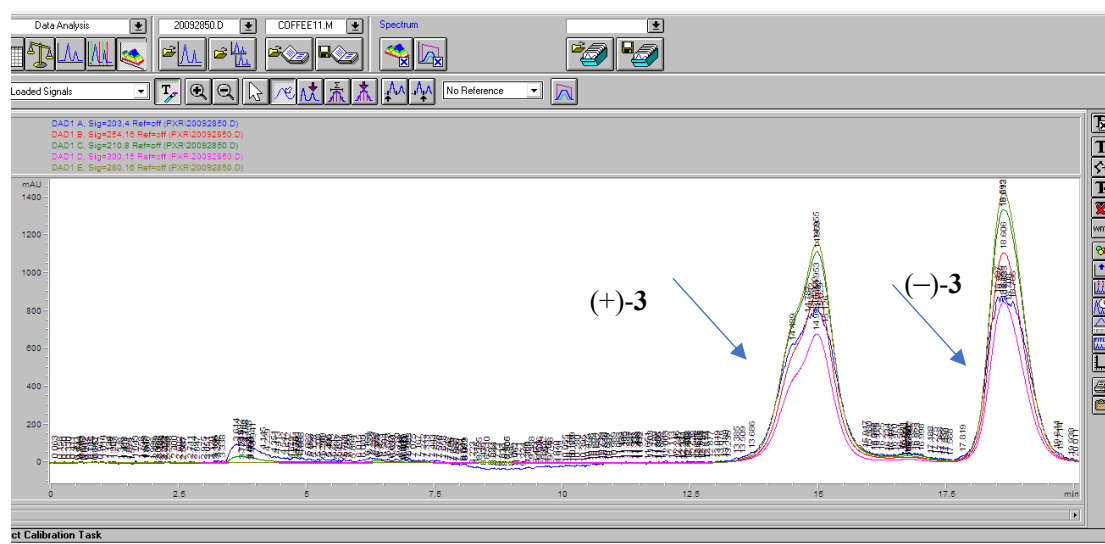

Figure S3-3.  $[\alpha]_D$  data of (+)-**3**

#### Rudolph Research Analytical

This sample was measured on an Autopol VI, Serial #91058  
 Manufactured by Rudolph Research Analytical, Hackettstown, NJ, USA.

Measurement Date : Monday, 12-OCT-2020

Set Temperature : OFF

Time Delay : Disabled

Delay between Measurement : Disabled

| n | Average | Std.Dev. | % RSD | Maximum | Minimum |
|---|---------|----------|-------|---------|---------|
| 5 | 37.38   | 0.31     | 0.82  | 37.63   | 36.88   |

| S.No | Sample ID | Time        | Result | Scale | OR °Arc | WLG.nm | Lg.mm  | Conc.g/100ml | Temp. |
|------|-----------|-------------|--------|-------|---------|--------|--------|--------------|-------|
| 1    | KMCR-10-1 | 01:55:12 PM | 37.63  | SR    | 0.0301  | 589    | 100.00 | 0.080        | 24.3  |
| 2    | KMCR-10-1 | 01:55:20 PM | 36.88  | SR    | 0.0295  | 589    | 100.00 | 0.080        | 24.3  |
| 3    | KMCR-10-1 | 01:55:28 PM | 37.38  | SR    | 0.0299  | 589    | 100.00 | 0.080        | 24.4  |
| 4    | KMCR-10-1 | 01:55:36 PM | 37.38  | SR    | 0.0299  | 589    | 100.00 | 0.080        | 24.4  |
| 5    | KMCR-10-1 | 01:55:44 PM | 37.63  | SR    | 0.0301  | 589    | 100.00 | 0.080        | 24.4  |

Figure S3-4.  $[\alpha]_D$  data of (-)-**3**

**Rudolph Research Analytical**

This sample was measured on an Autopol VI, Serial #91058  
Manufactured by Rudolph Research Analytical, Hackettstown, NJ, USA.

Measurement Date : Monday, 12-OCT-2020

Set Temperature : OFF

Time Delay : Disabled

Delay between Measurement : Disabled

|             |                  |                 |               |                |                |               |              |                     |              |  |
|-------------|------------------|-----------------|---------------|----------------|----------------|---------------|--------------|---------------------|--------------|--|
| <b>n</b>    | <b>Average</b>   | <b>Std.Dev.</b> | <b>% RSD</b>  | <b>Maximum</b> | <b>Minimum</b> |               |              |                     |              |  |
| 5           | -38.44           | 0.33            | -0.85         | -38.20         | -39.00         |               |              |                     |              |  |
| <b>S.No</b> | <b>Sample ID</b> | <b>Time</b>     | <b>Result</b> | <b>Scale</b>   | <b>OR °Arc</b> | <b>WLG.nm</b> | <b>Lg.mm</b> | <b>Conc.g/100ml</b> | <b>Temp.</b> |  |
| 1           | KMCR-10-2        | 02:16:05 PM     | -38.20        | SR             | -0.0191        | 589           | 100.00       | 0.050               | 24.9         |  |
| 2           | KMCR-10-2        | 02:16:13 PM     | -39.00        | SR             | -0.0195        | 589           | 100.00       | 0.050               | 24.9         |  |
| 3           | KMCR-10-2        | 02:16:21 PM     | -38.40        | SR             | -0.0192        | 589           | 100.00       | 0.050               | 24.9         |  |
| 4           | KMCR-10-2        | 02:16:29 PM     | -38.20        | SR             | -0.0191        | 589           | 100.00       | 0.050               | 24.9         |  |
| 5           | KMCR-10-2        | 02:16:37 PM     | -38.40        | SR             | -0.0192        | 589           | 100.00       | 0.050               | 24.9         |  |

Figure S3-5. CD and UV spectrum of (+)-**3** in MeOH

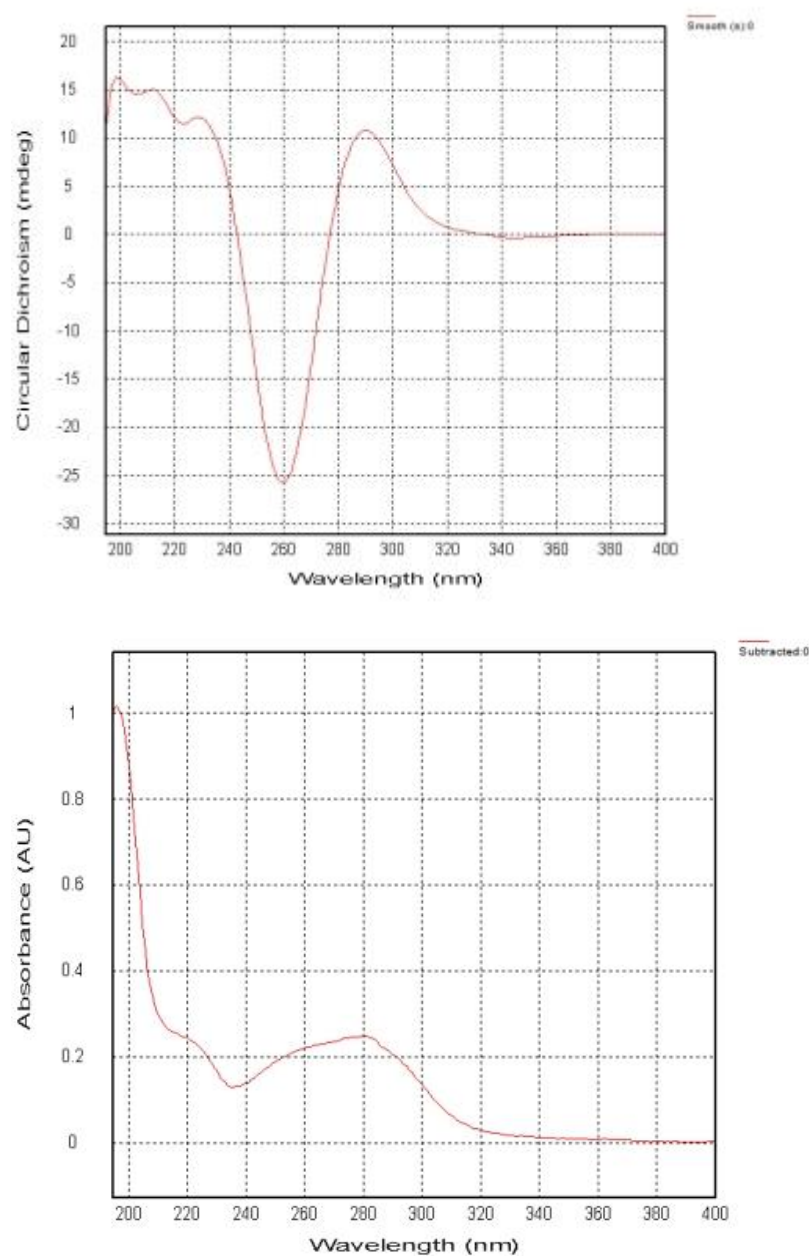

File: KMCR-10-1-1mm (195-400 nm) 20101314.dsx

ProBinaryX

Attributes :

- Time Stamp :Tue Oct 13 13:23:11 2020

- File ID : {7F932724-A7E0-4c10-9846-AD5C6E93BD92}

- Is CFR Compliant : false

- Original data has not been modified.

Remarks:

- User: CD

- Date: 2020/10/13

- Instrument: 0547

- DetectorType: LAAPD

- DichOS Calibration Correction Curve: 0547/2

- HV (CDDC channel): 0 v

- Time per point: 1 s

- Description: Sample 1

- Concentration: 0.0461mg/mL MeOH

- Pathlength: 1 mm

- Temperature: 20°C

Settings:

- Time-per-point: 1s (25us x 40000)

- SE

- Wavelength: 195nm - 400nm

- Step Size: 1nm

- Bandwidth: 1nm

Figure S3-6. CD and UV spectrum of (–)-**3** in MeOH

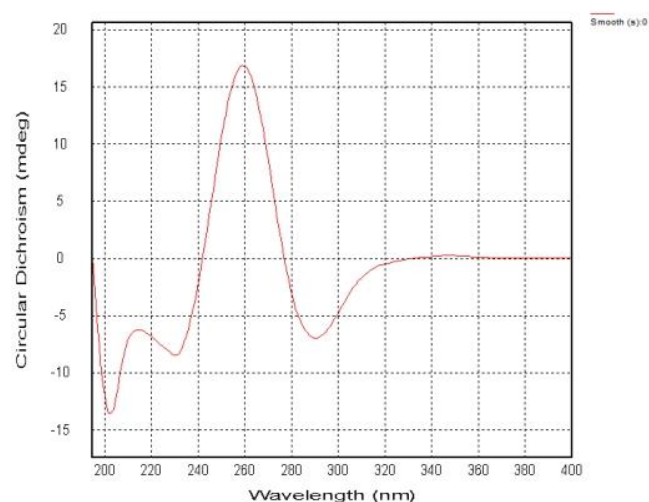

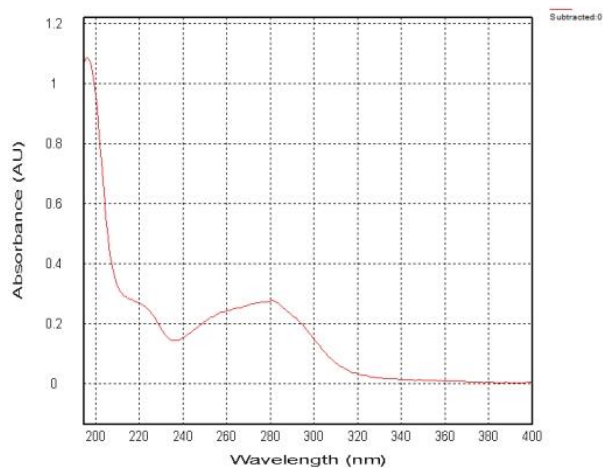

File: KMCR-10-2-1mm (195-400 nm) 20101315.dsx

ProBinaryX

Attributes :

- Time Stamp :Tue Oct 13 13:41:19 2020

- File ID : {57E8BF71-1B1F-4b0d-9BFF-8D1E35EE633B}

- Is CFR Compliant : false

- Original data has not been modified.

Remarks:

- User: CD

- Date: 2020/10/13

- Instrument: 0547

- DetectorType: LAAPD

- DichOS Calibration Correction Curve: 0547/2

- HV (CDDC channel): 0 v

- Time per point: 1 s

- Description: Sample 1

- Concentration: 0.0324mg/mL MeOH

- Pathlength: 1 mm

- Temperature: 20°C

Settings:

- Time-per-point: 1s (25us x 40000)

- SE

- Wavelength: 195nm - 400nm

- Step Size: 1nm

- Bandwidth: 1nm

Figure S3-7.  $^1\text{H}$  NMR spectrum of **3** in  $\text{CDCl}_3$  (600 MHz)

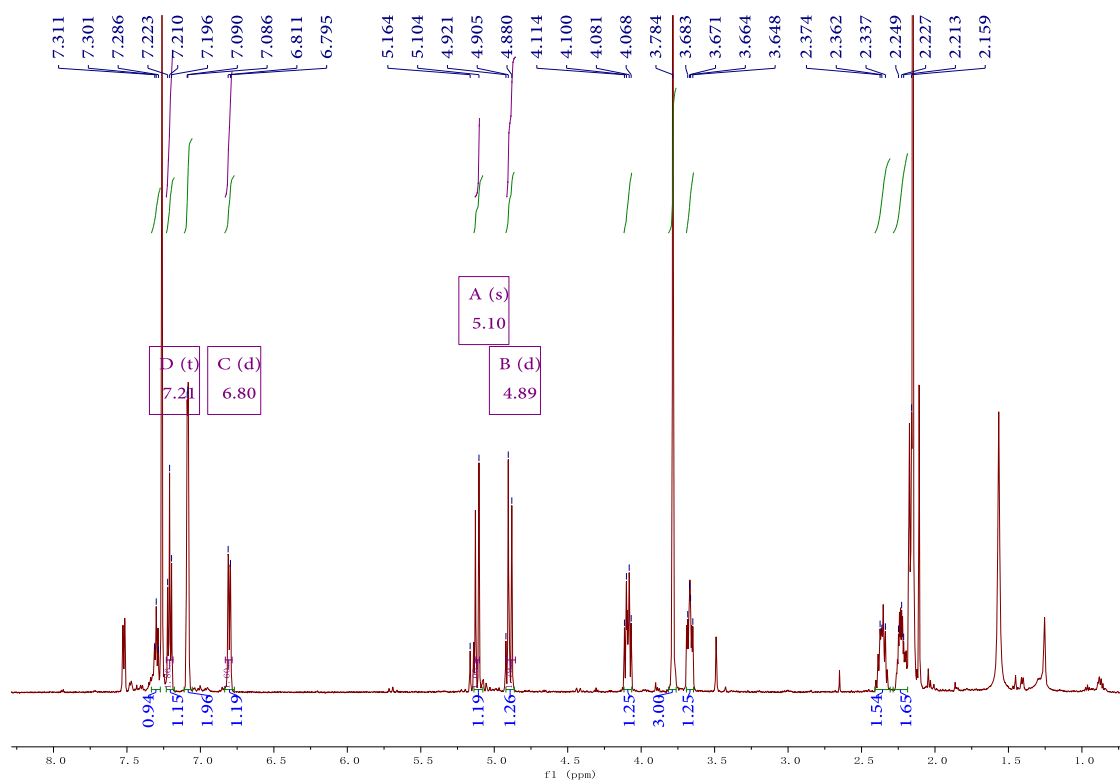

Figure S3-8.  $^{13}\text{C}$  NMR spectrum of **3** in  $\text{CDCl}_3$  (150 MHz)

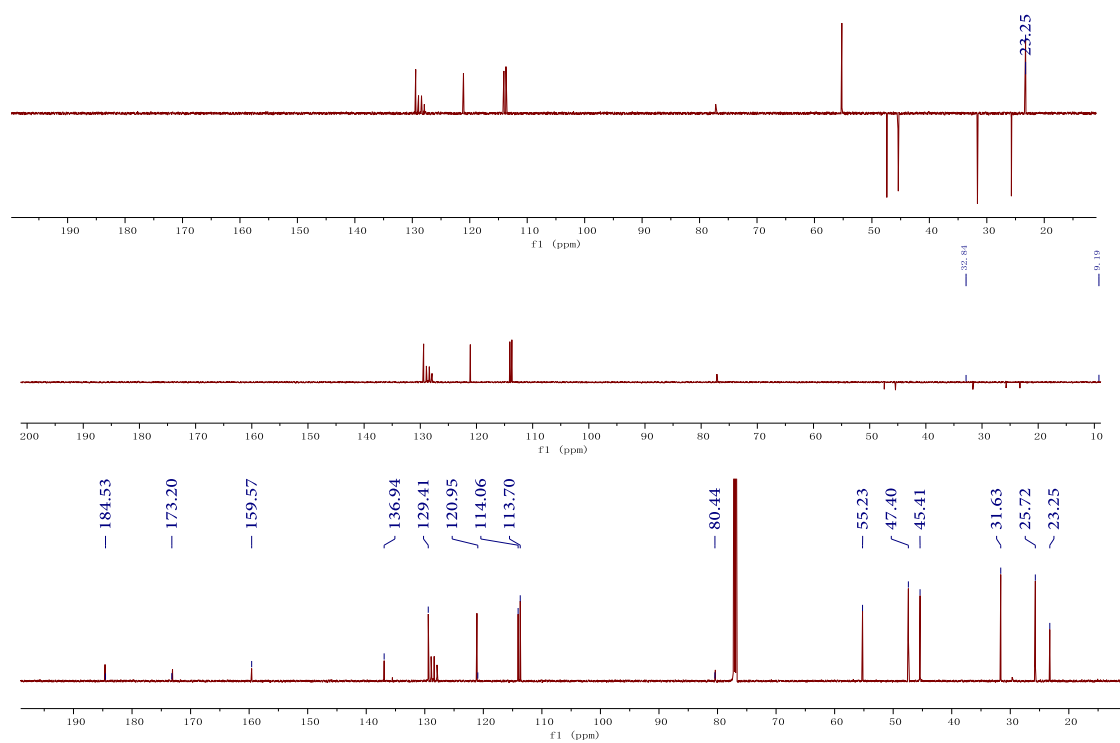

Figure S3-9.  $^1\text{H}$ - $^1\text{H}$  COSY spectrum of **3** in  $\text{CDCl}_3$  (600 MHz)

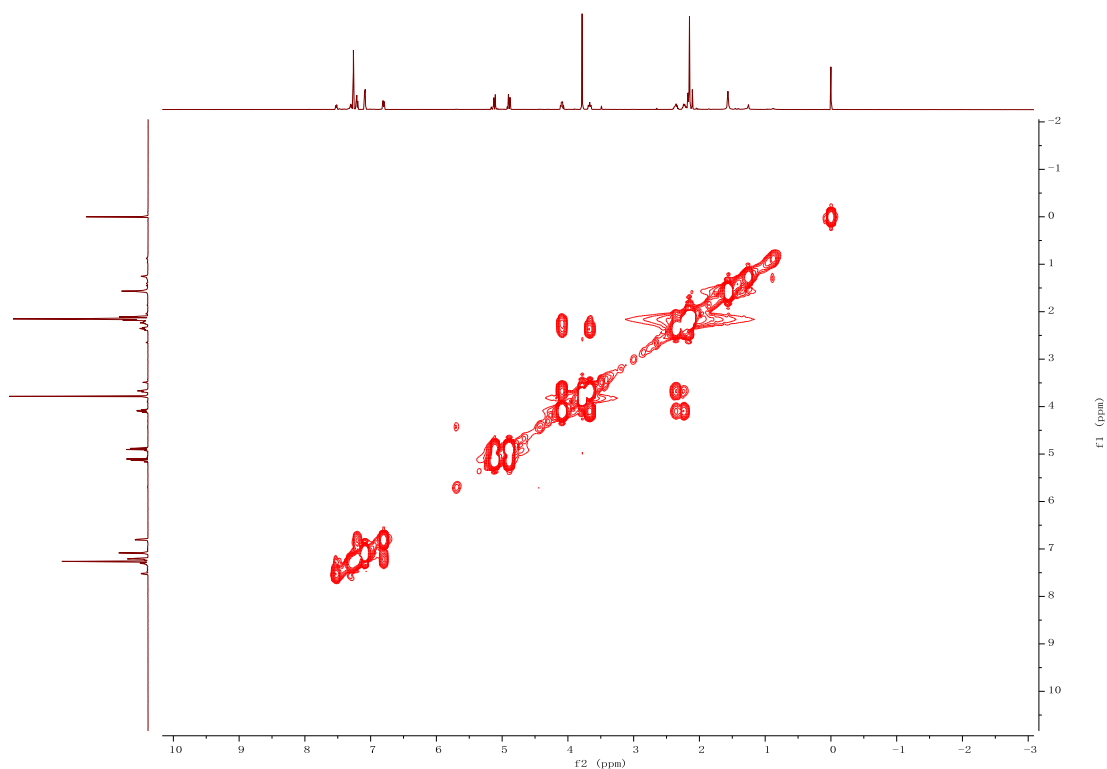

Figure S3-10. HSQC spectrum of **3** in  $\text{CDCl}_3$  (600 MHz)

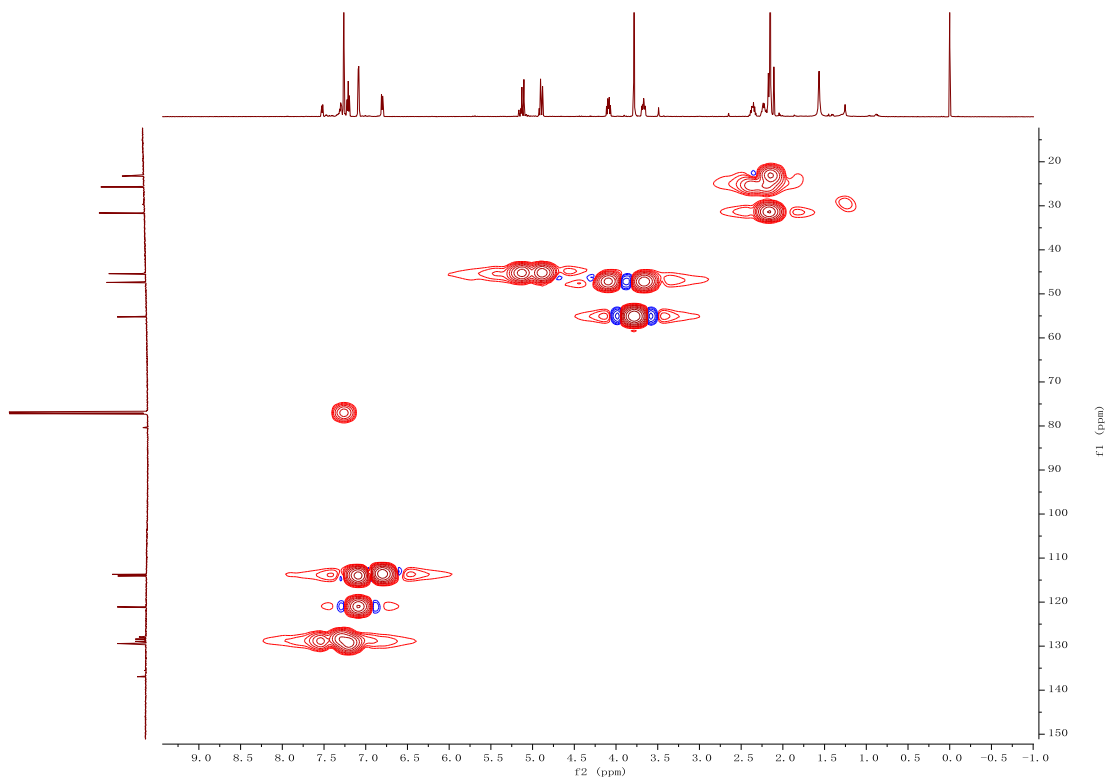

Figure S3-11 HMBC spectrum of **3** in CDCl<sub>3</sub> (600 MHz)

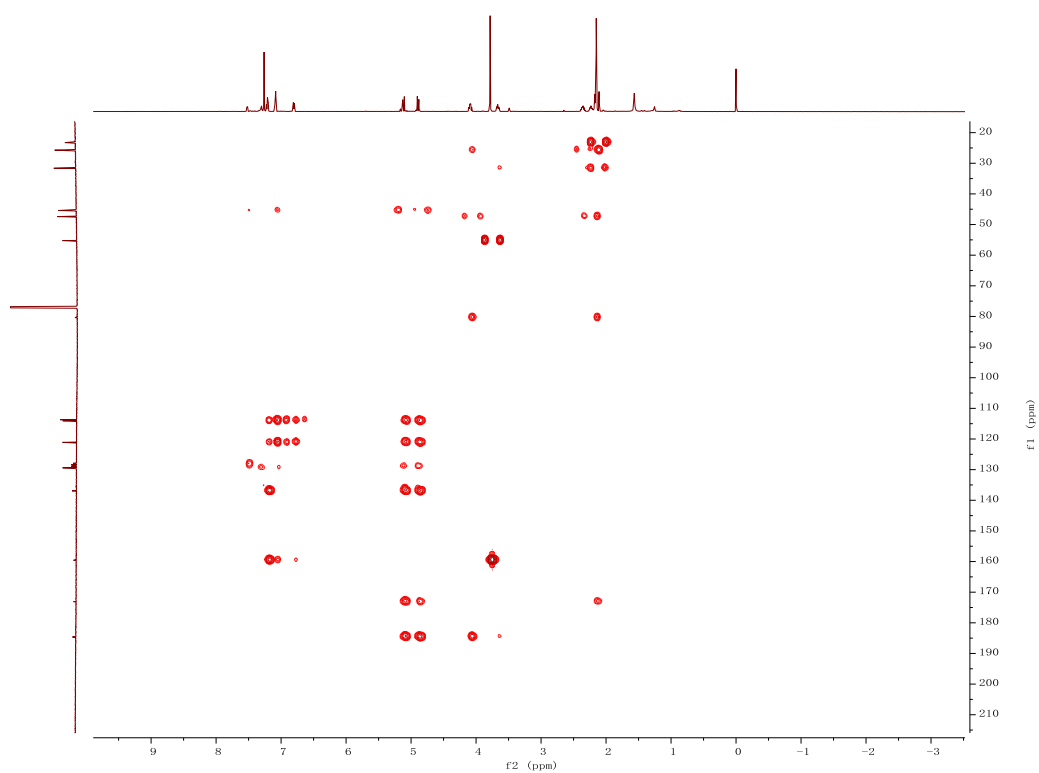



Figure S4-1. HR-ESI-MS spectrum of 4

## Qualitative Analysis Report

|                               |              |                      |                       |
|-------------------------------|--------------|----------------------|-----------------------|
| <b>Data Filename</b>          | kzm853nn.d   | <b>Sample Name</b>   | kzm853nn              |
| <b>Sample Type</b>            | Sample       | <b>Position</b>      | P1-B8                 |
| <b>Instrument Name</b>        | Instrument 1 | <b>User Name</b>     |                       |
| <b>Acq Method</b>             | s-.m         | <b>Acquired Time</b> | 9/16/2020 11:22:57 AM |
| <b>IRM Calibration Status</b> | Success      | <b>DA Method</b>     | Default.m             |
| <b>Comment</b>                |              |                      |                       |

  

|                       |                             |              |
|-----------------------|-----------------------------|--------------|
| <b>Sample Group</b>   |                             | <b>Info.</b> |
| <b>Acquisition SW</b> | 6200 series TOF/6500 series |              |
| <b>Version</b>        | Q-TOF B.05.01 (B5125.2)     |              |

### User Spectra

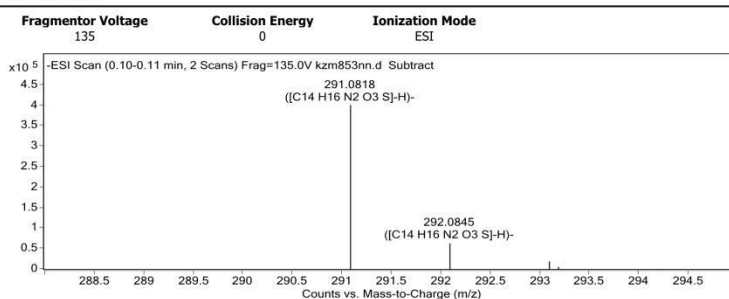

### Peak List

| m/z      | z | Abund     | Formula         | Ion    |
|----------|---|-----------|-----------------|--------|
| 185.0394 |   | 48709.22  |                 |        |
| 255.2336 | 1 | 199032.97 |                 |        |
| 261.0708 | 1 | 56235.94  |                 |        |
| 283.2651 | 1 | 111140.55 |                 |        |
| 291.0818 | 1 | 400975.81 | C14 H16 N2 O3 S | (M-H)- |
| 292.0845 | 1 | 65118.77  | C14 H16 N2 O3 S | (M-H)- |
| 311.1697 | 1 | 88956.39  |                 |        |
| 325.1853 | 1 | 159172.33 |                 |        |
| 339.2011 | 1 | 179109.22 |                 |        |
| 547.3228 | 1 | 104347.63 |                 |        |

### Formula Calculator Element Limits

| Element | Min | Max |
|---------|-----|-----|
| C       | 3   | 60  |
| H       | 0   | 120 |
| O       | 0   | 30  |
| N       | 0   | 30  |
| S       | 0   | 5   |

### Formula Calculator Results

| Formula         | CalculatedMass | CalculatedMz | Mz       | Diff. (mDa) | Diff. (ppm) | DBE    |
|-----------------|----------------|--------------|----------|-------------|-------------|--------|
| C14 H16 N2 O3 S | 292.0882       | 291.0809     | 291.0818 | -0.90       | -3.09       | 8.0000 |

--- End Of Report ---

Figure S4-2. ESI-MS spectrum of **4**

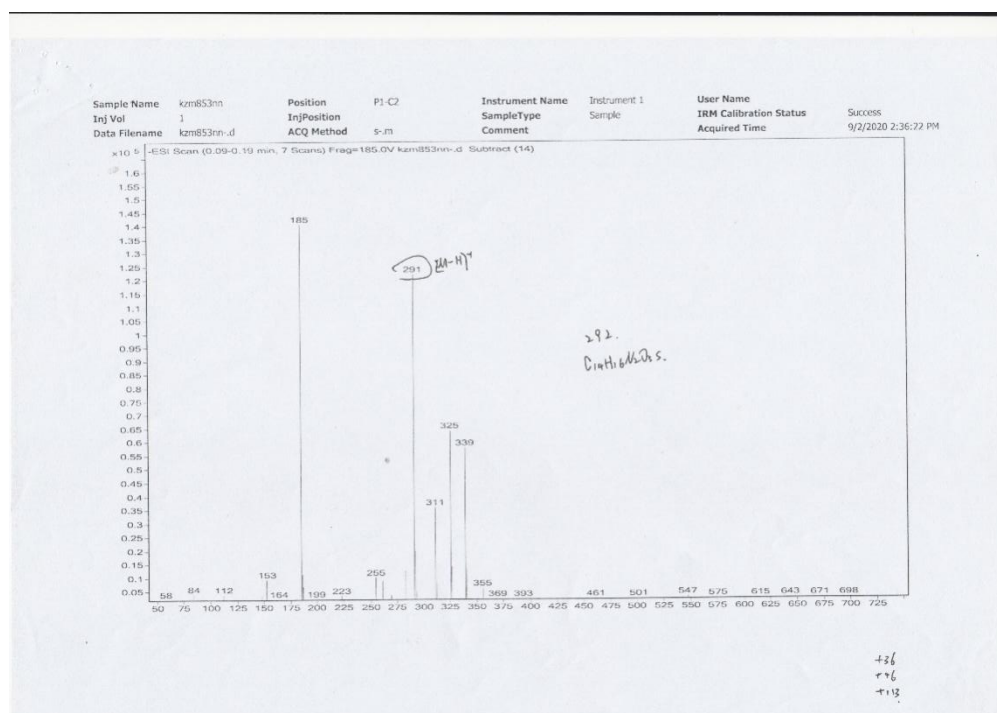

Figure S4-3 UV spectrum of **4** in MeOH

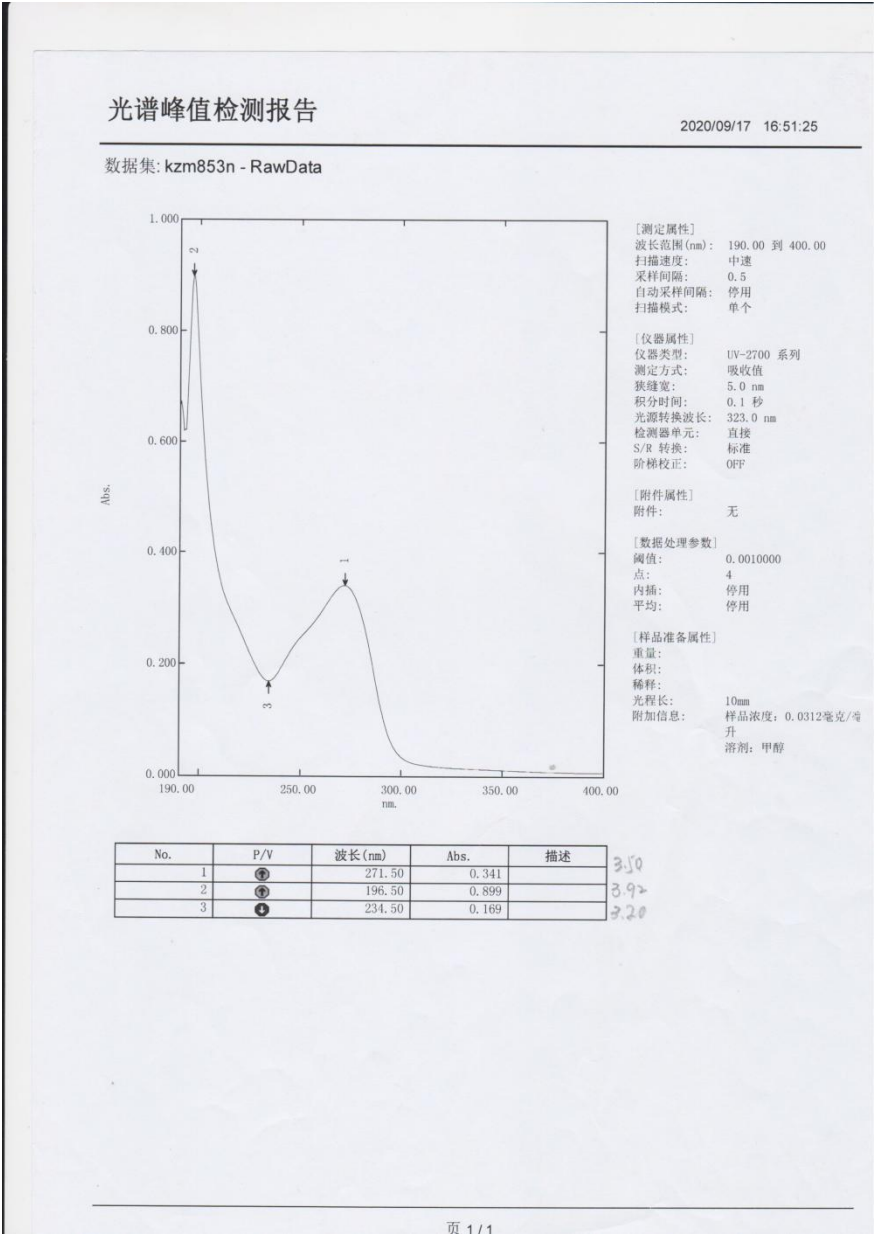

Figure S4-4  $[\alpha]_D$  data of **4**

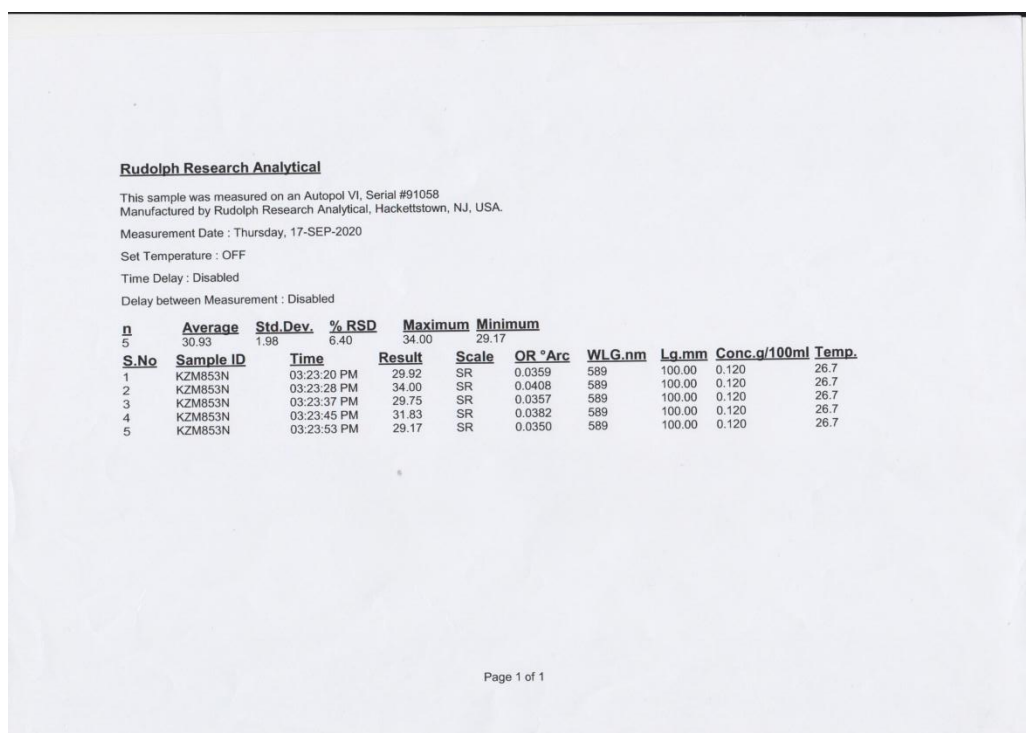

Figure S4-5  $^1\text{H}$  NMR spectrum of **4** in  $\text{CDCl}_3$  (600 MHz)

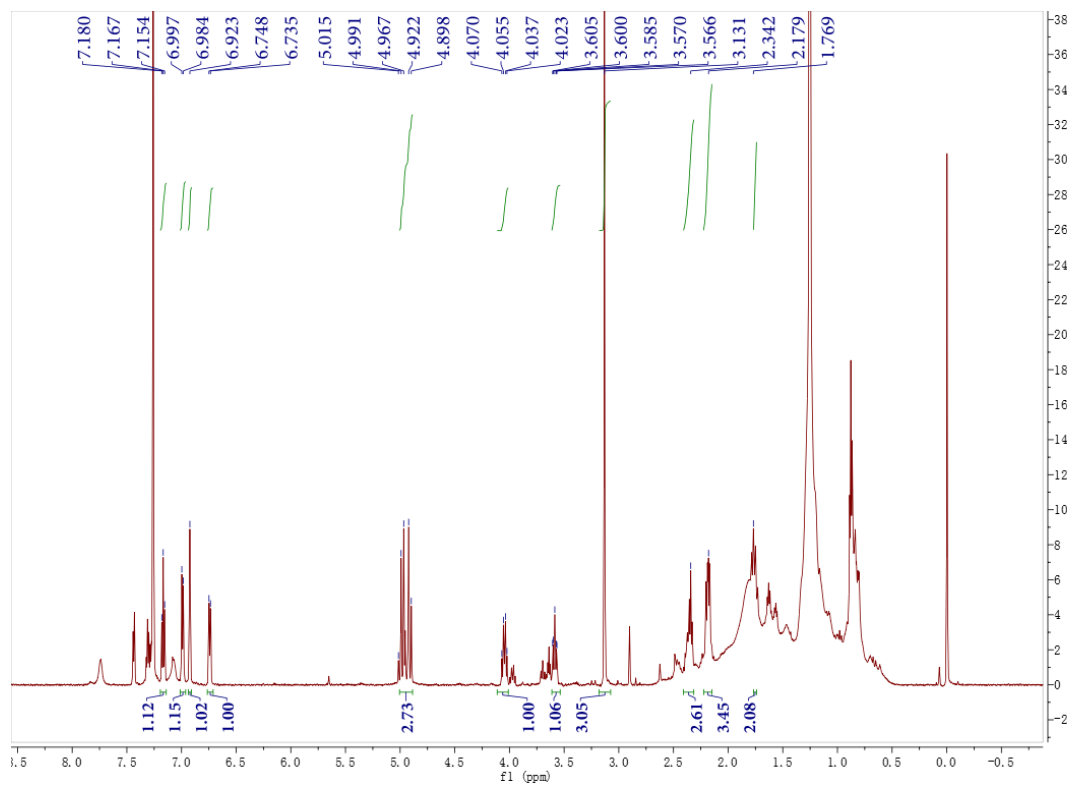

Figure S4-6  $^{13}\text{C}$  NMR spectrum of **4** in  $\text{CDCl}_3$  (150 MHz)

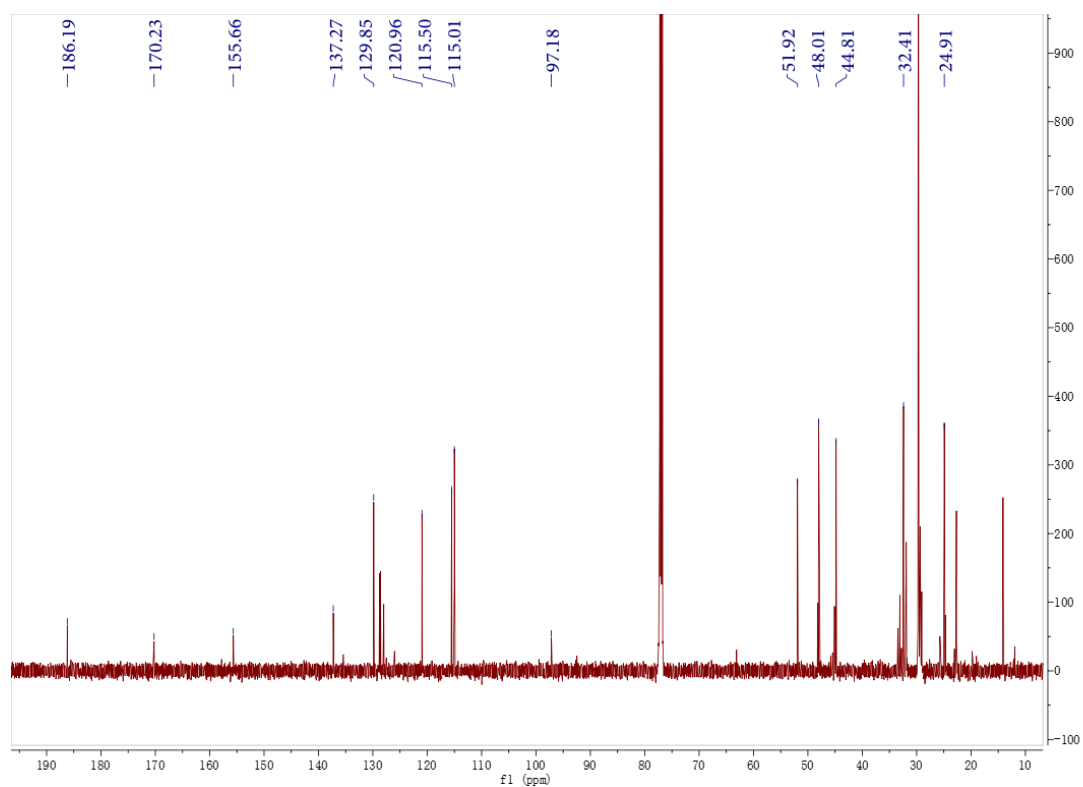

Figure S4-7  $^1\text{H}$ - $^1\text{H}$  COSY spectrum of **4** in  $\text{CDCl}_3$  (600 MHz)

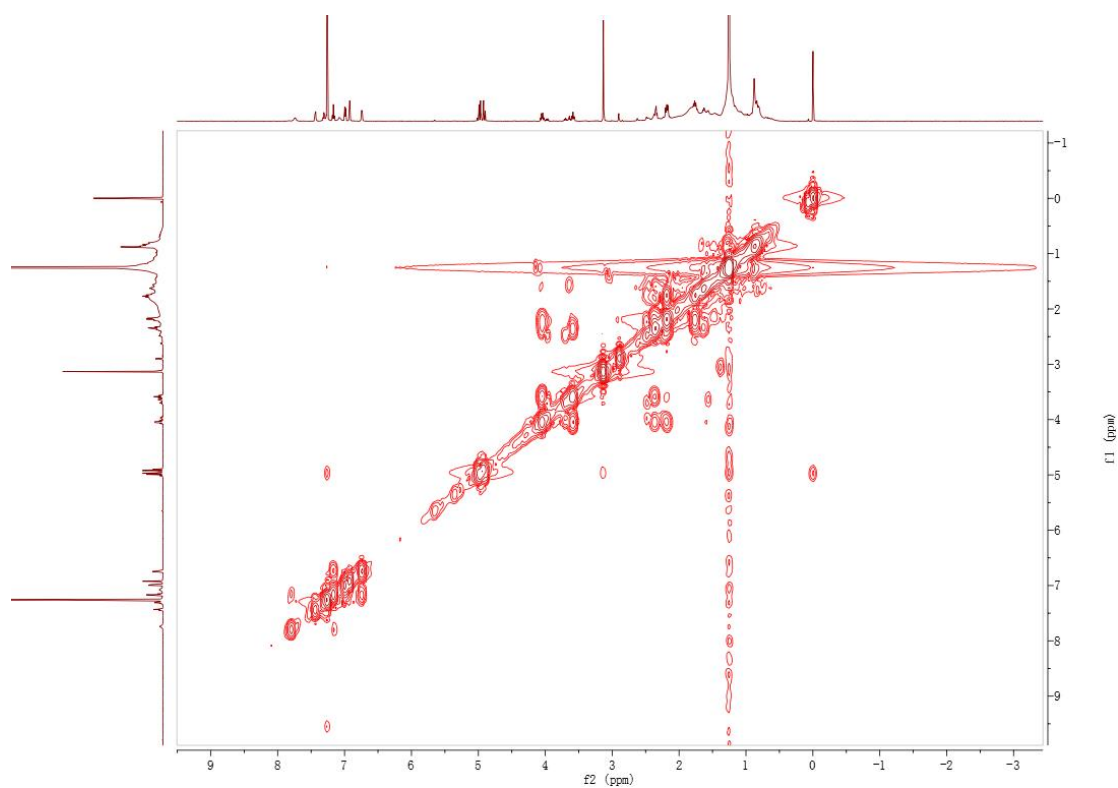

Figure S4-8 HSQC spectrum of **4** in CDCl<sub>3</sub> (600 MHz)

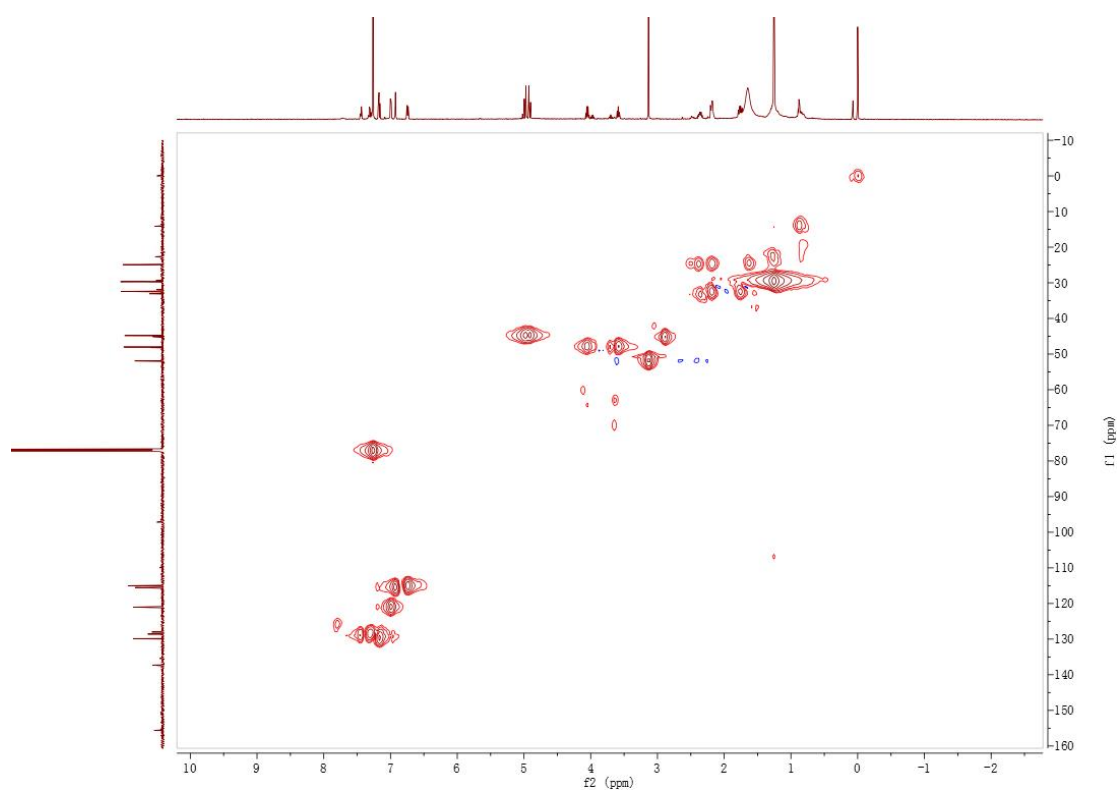

Figure S4-9 HMBC spectrum of **4** in CDCl<sub>3</sub> (600 MHz)

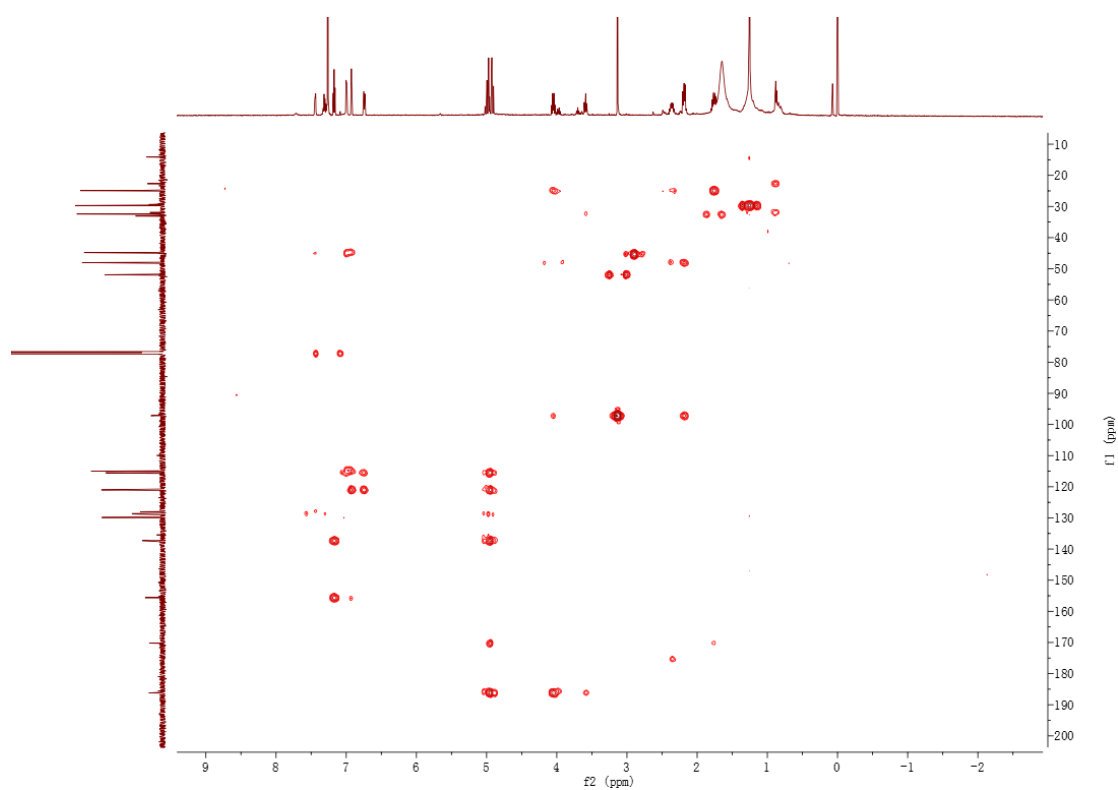

Figure S5-1. HR-ESI-MS spectrum of **5**

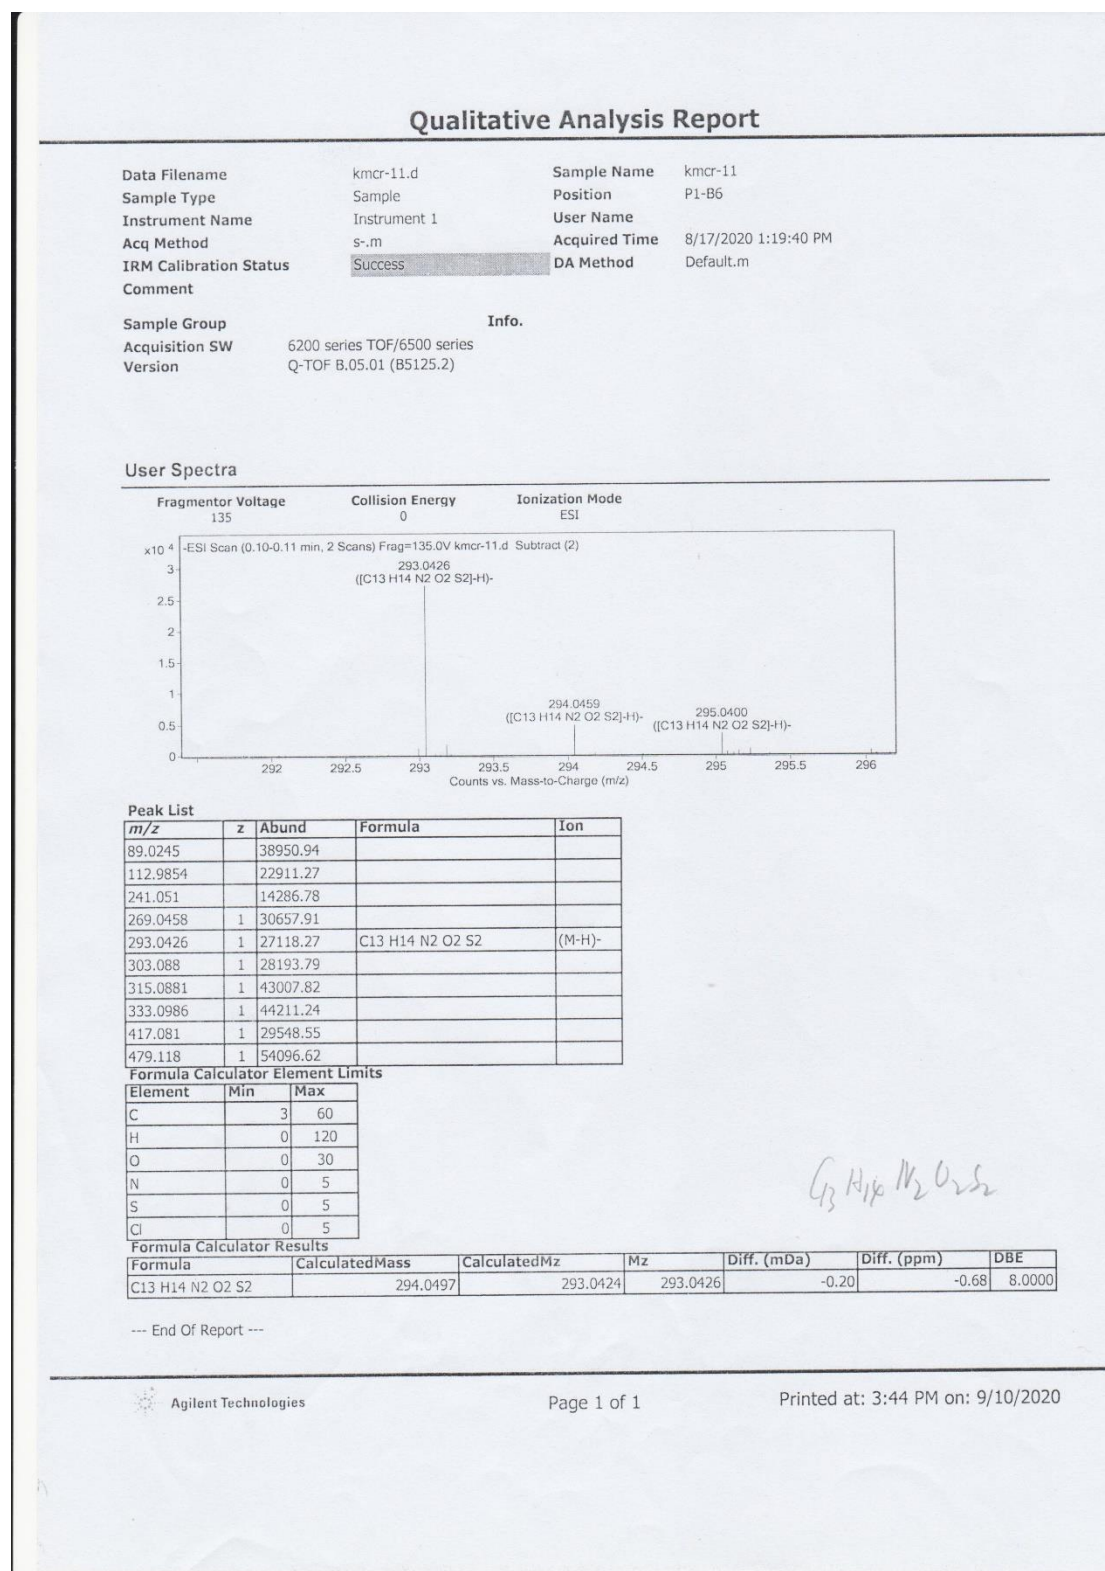



Figure S5-2. ESI-MS spectrum of **5**

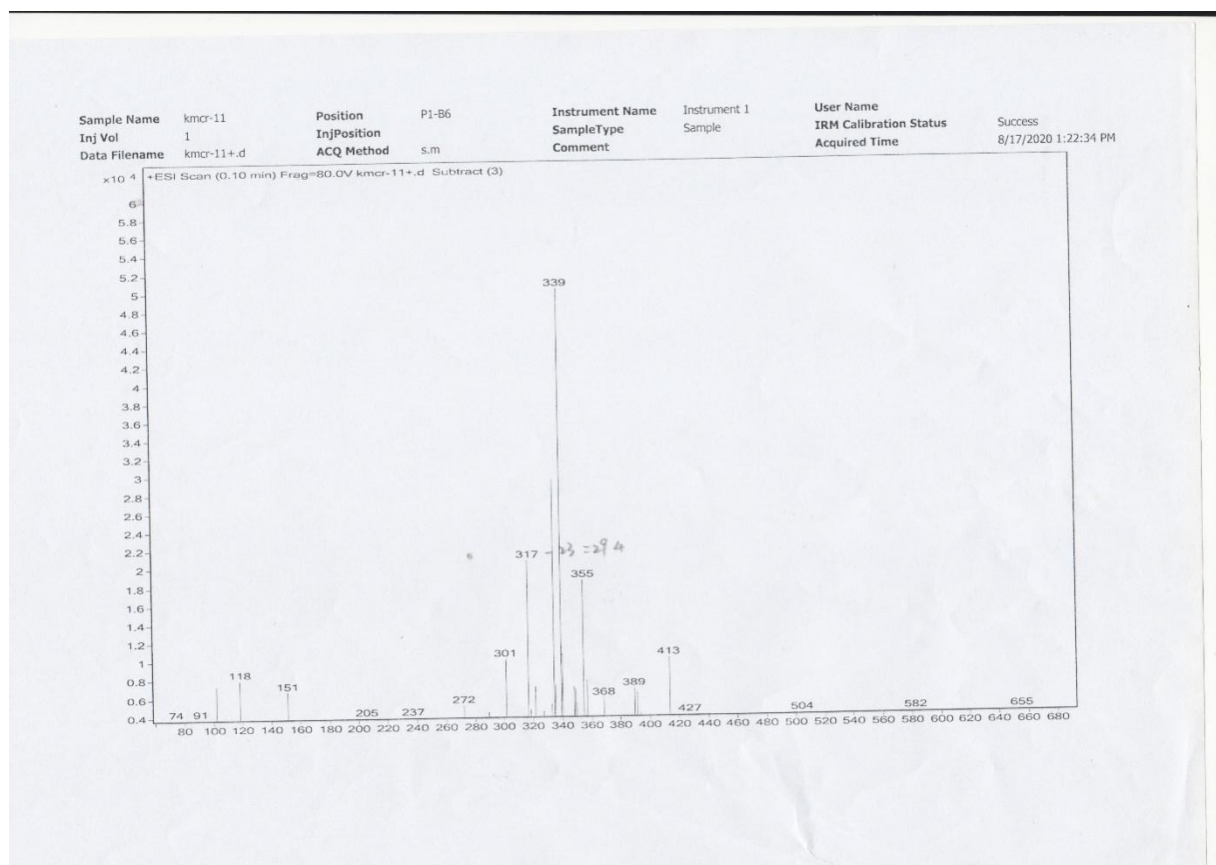

Figure S5-3  $[\alpha]_D$  data of **5**

**Rudolph Research Analytical**

This sample was measured on an Autopol VI, Serial #91058  
 Manufactured by Rudolph Research Analytical, Hackettstown, NJ, USA.

Measurement Date : Thursday, 17-SEP-2020

Set Temperature : OFF

Time Delay : Disabled

Delay between Measurement : Disabled

| <u>n</u> | <u>Average</u> | <u>Std.Dev.</u> | <u>% RSD</u> | <u>Maximum</u> | <u>Minimum</u> |
|----------|----------------|-----------------|--------------|----------------|----------------|
| 5        | 108.38         | 1.04            | 0.95         | 109.88         | 107.38         |

| <u>S.No</u> | <u>Sample ID</u> | <u>Time</u> | <u>Result</u> | <u>Scale</u> | <u>OR °Arc</u> | <u>WLG.nm</u> | <u>Lg.mm</u> | <u>Conc.g/100ml</u> | <u>Temp.</u> |
|-------------|------------------|-------------|---------------|--------------|----------------|---------------|--------------|---------------------|--------------|
| 1           | KMCR-11          | 06:12:36 PM | 108.25        | SR           | 0.0866         | 589           | 100.00       | 0.080               | 26.0         |
| 2           | KMCR-11          | 06:12:44 PM | 107.50        | SR           | 0.0860         | 589           | 100.00       | 0.080               | 26.0         |
| 3           | KMCR-11          | 06:12:53 PM | 107.38        | SR           | 0.0859         | 589           | 100.00       | 0.080               | 26.0         |
| 4           | KMCR-11          | 06:13:01 PM | 108.88        | SR           | 0.0871         | 589           | 100.00       | 0.080               | 26.1         |
| 5           | KMCR-11          | 06:13:09 PM | 109.88        | SR           | 0.0879         | 589           | 100.00       | 0.080               | 26.1         |



Figure S5-4. CD and UV spectrum of **5** in MeOH

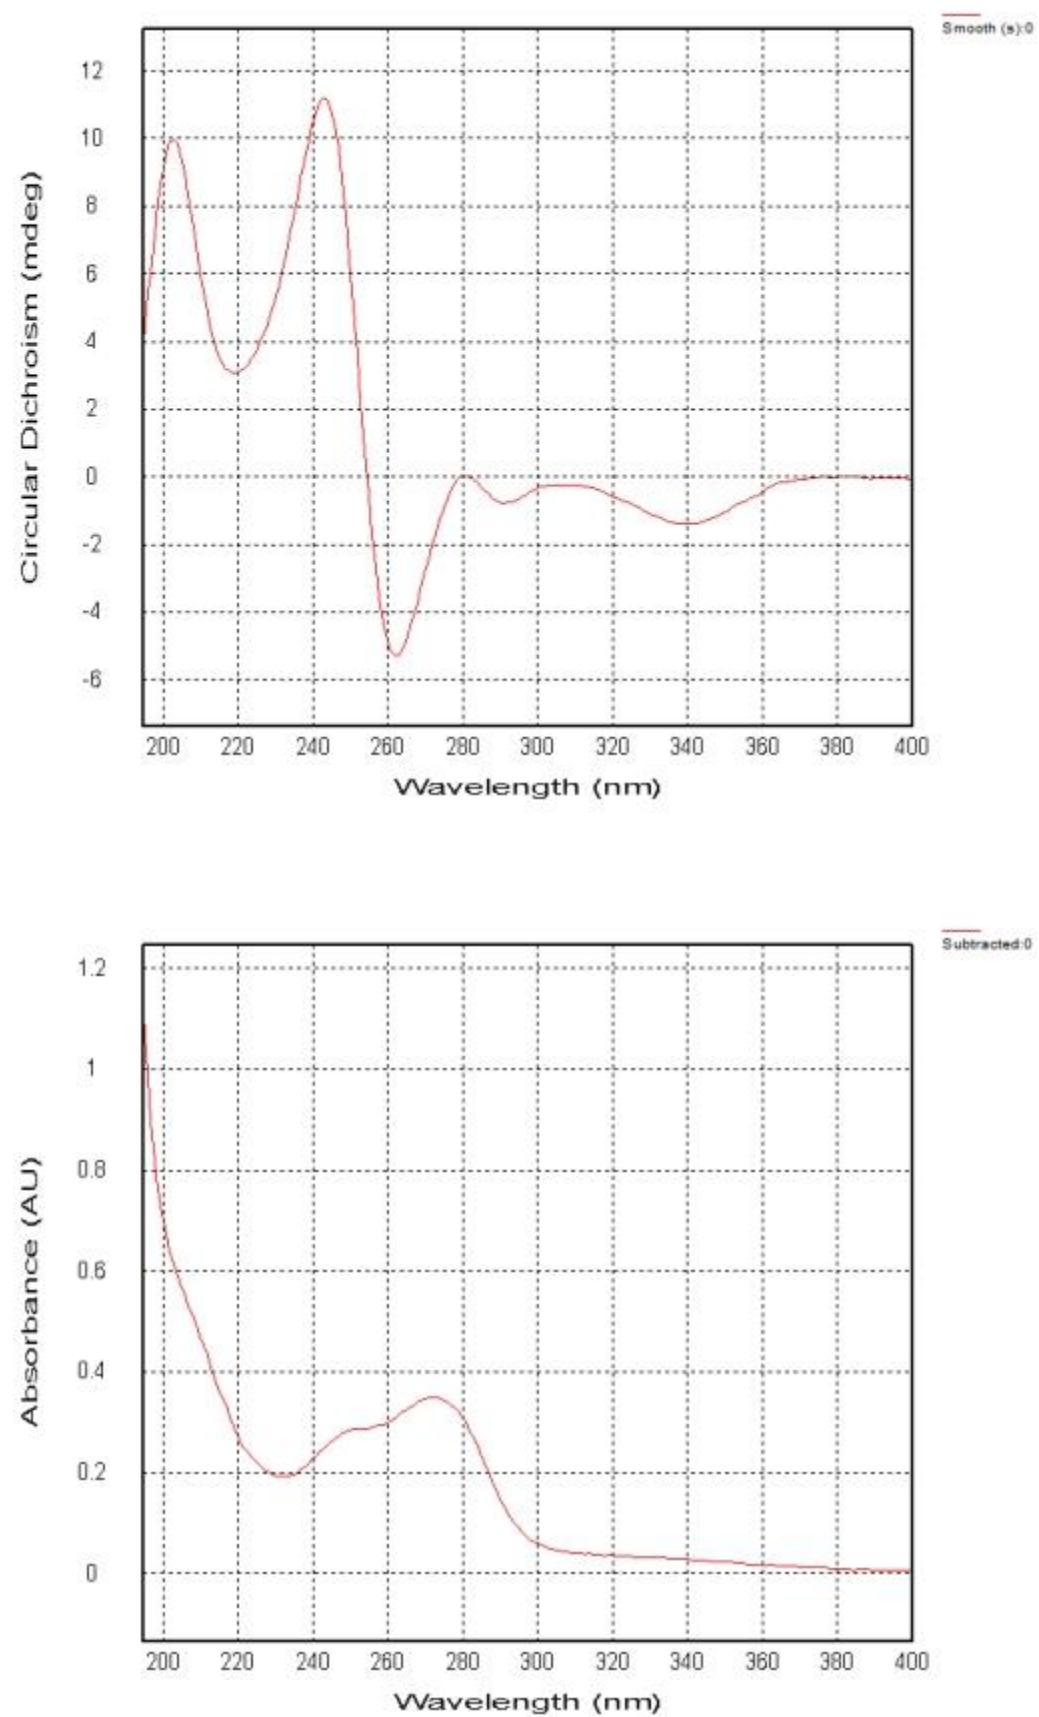

File: KMCR-11-1mm (195-400 nm) 20101316.dsx

ProBinaryX

Attributes :

- Time Stamp :Tue Oct 13 14:02:29 2020

- File ID : {B11F87C2-AC1E-49a4-A092-F2FC74DFBB25}

- Is CFR Compliant : false

- Original data has not been modified.

Remarks:

- User: CD

- Date: 2020/10/13

- Instrument: 0547

- DetectorType: LAAPD

- DichOS Calibration Correction Curve: 0547/2

- HV (CDDC channel): 0 v

- Time per point: 1 s

- Description: Sample 1

- Concentration: 0.0461mg/mL MeOH

- Pathlength: 1 mm

- Temperature: 20°C

Settings:

- Time-per-point: 1s (25us x 40000)

- SE

- Wavelength: 195nm - 400nm

- Step Size: 1nm

- Bandwidth: 1nm

Figure S5-5.  $^1\text{H}$  NMR spectrum of **5** in  $\text{CDCl}_3$  (600 MHz)

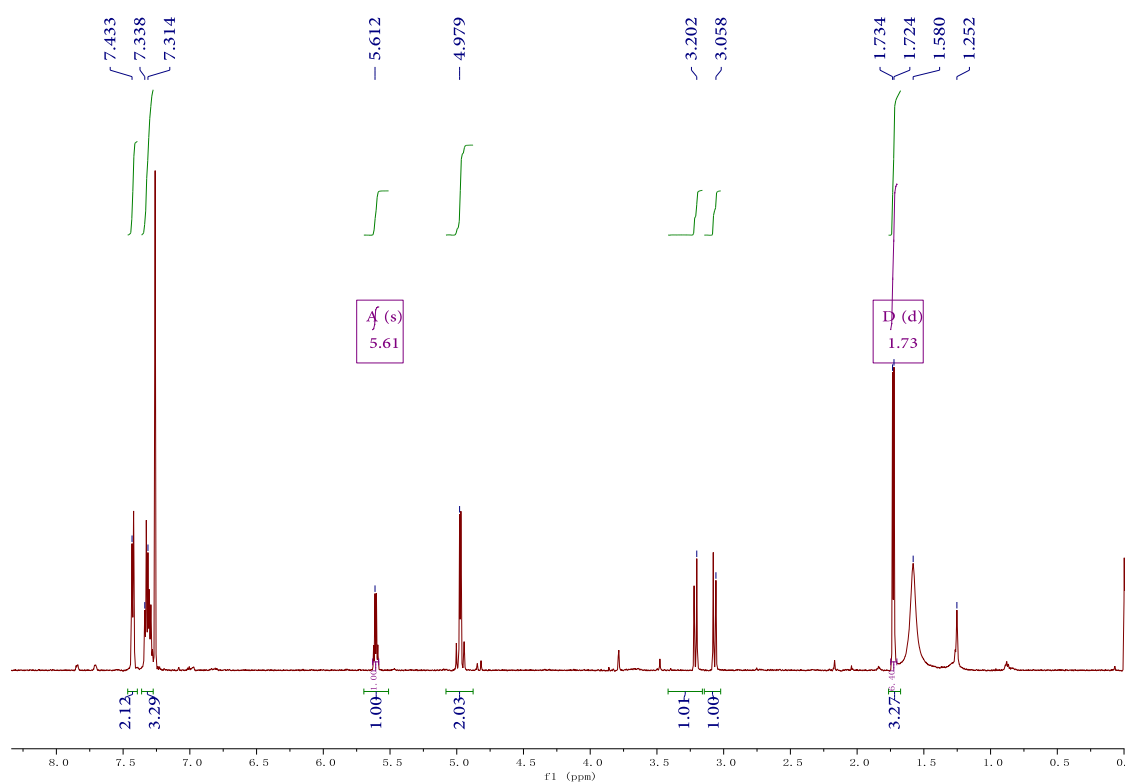

Figure S5-6.  $^{13}\text{C}$  NMR spectrum of **5** in  $\text{CDCl}_3$  (150 MHz)

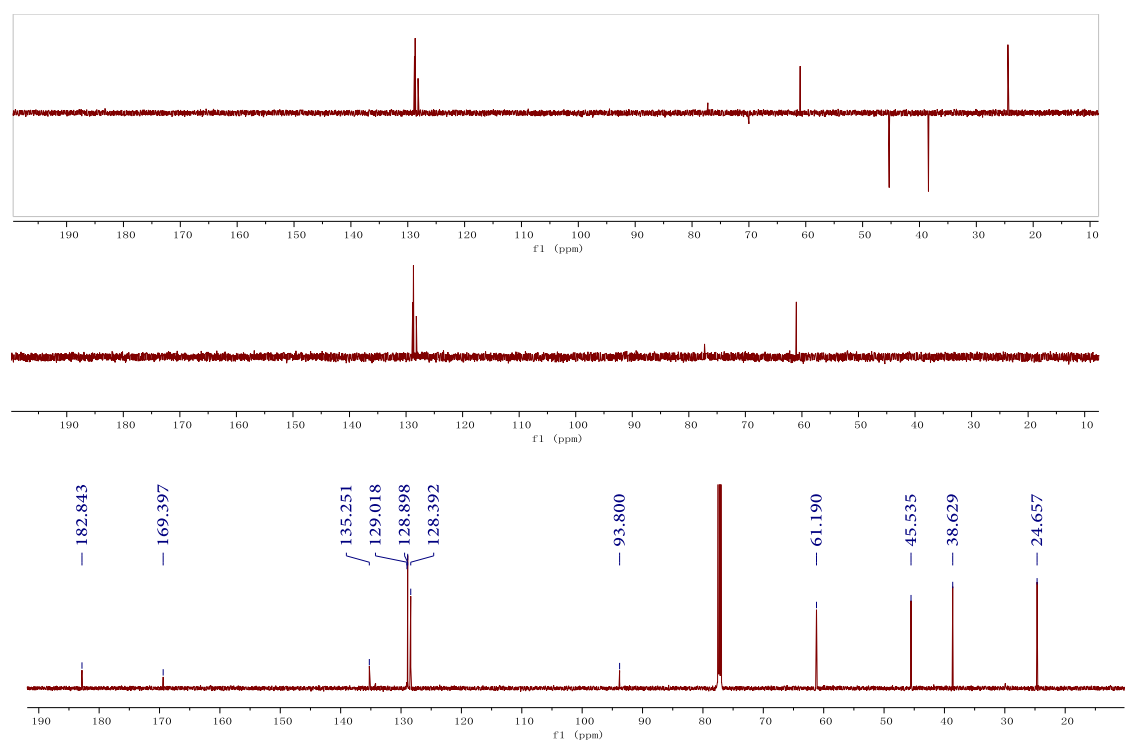

Figure S5-7.  $^1\text{H}$ - $^1\text{H}$  COSY spectrum of **5** in  $\text{CDCl}_3$  (600 MHz)

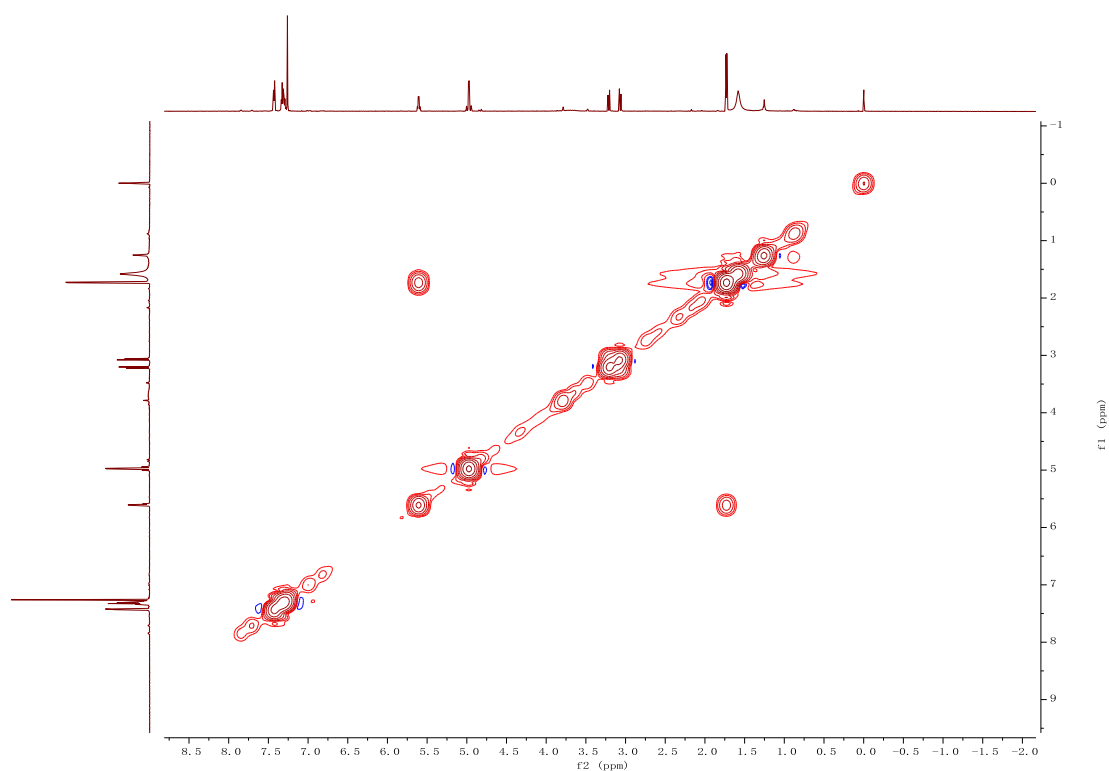

Figure S5-8. HSQC spectrum of **5** in  $\text{CDCl}_3$  (600 MHz)

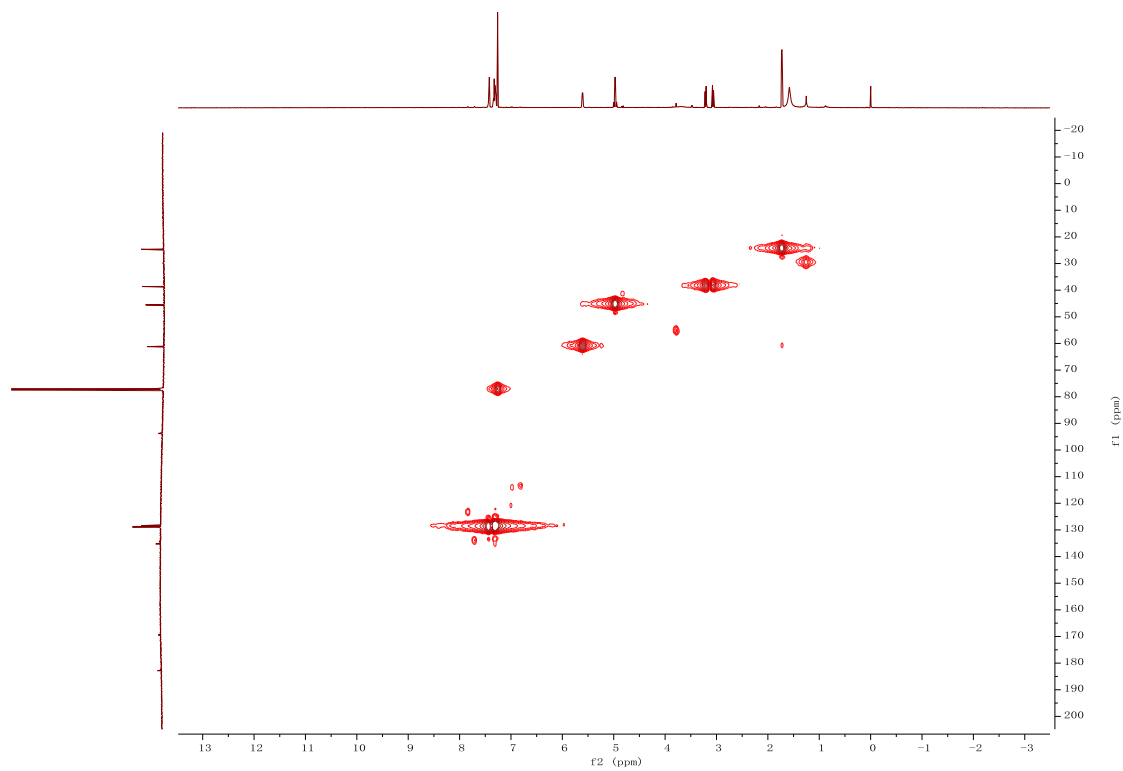

Figure S5-9. HMBC spectrum of **5** in  $\text{CDCl}_3$  (600 MHz)

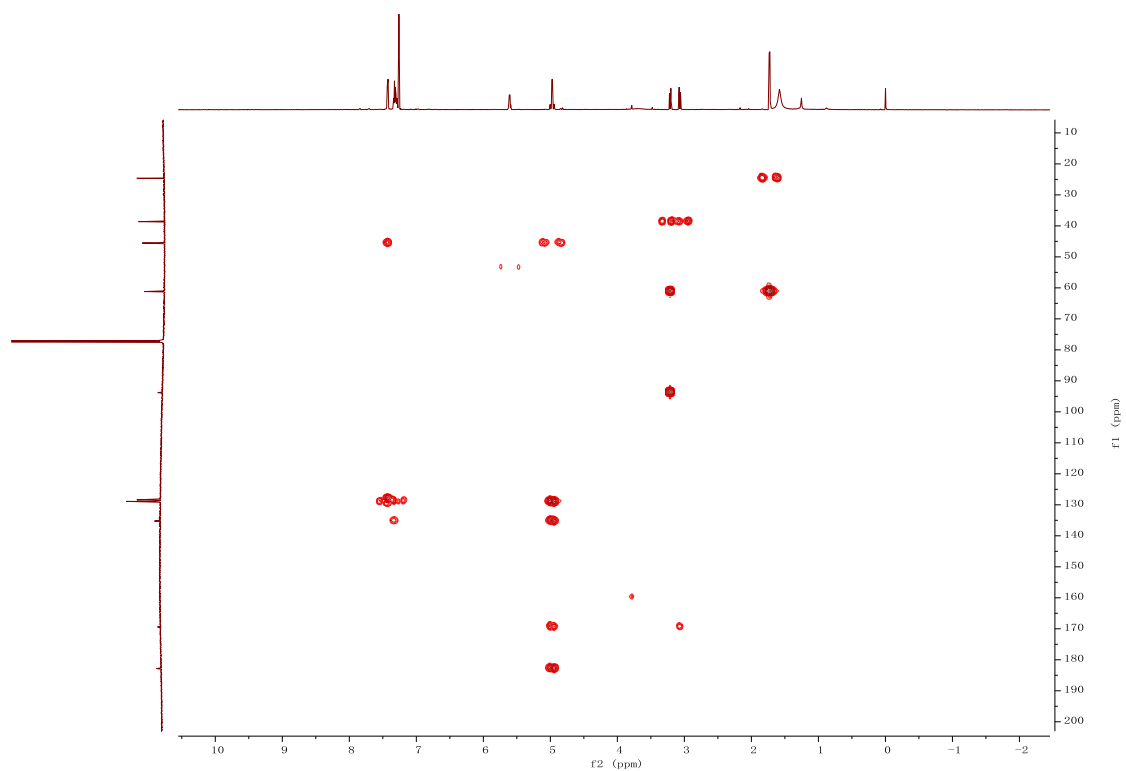

Figure S6 Neuroprotective activities of selected compounds

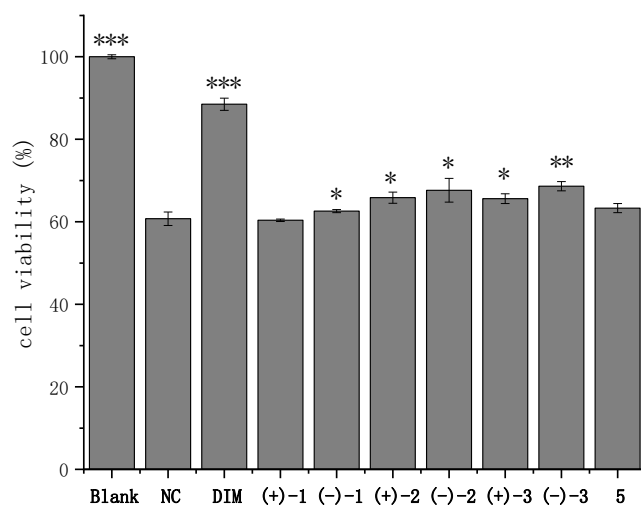

\*  $P < 0.05$ , \*\*  $p < 0.01$ , and \*\*\* $P < 0.001$  vs NC group; NC: negative group; DIM: positive control group.
